**Title:**

Housing temperature influences exercise training adaptations in mice

**Authors:** Steffen H. Raun<sup>1</sup>, Carlos Henriquez Olguín<sup>1</sup>, Iuliia Karavaeva<sup>2</sup>, Mona Ali<sup>1</sup>, Lisbeth L. V. Møller<sup>1</sup>, Witold Kot<sup>3</sup>, Josué L. Castro Mejía<sup>4</sup>, Dennis Sandris Nielsen<sup>4</sup>, Zach Gerhart-Hines<sup>2</sup>, Erik A. Richter<sup>1\*</sup>, and Lykke Sylow<sup>1\*</sup>

\*Corresponding authors: Lshansen@nexs.ku.dk, Erichter@nexs.ku.dk

**Affiliation:**

<sup>1</sup> Section of Molecular Physiology, Department of Nutrition, Exercise and Sports, Faculty of Science, University of Copenhagen, Copenhagen, 2100, Denmark

<sup>2</sup> Novo Nordisk Foundation Center for Basic Metabolic Research, University of Copenhagen, Copenhagen 2200, Denmark

<sup>3</sup> Department of Environmental Sciences, Aarhus University

<sup>4</sup> Department of Food Science, Faculty of Science, University of Copenhagen, Rolighedsvej 26, Frederiksberg, 1958, Denmark

**Keywords:** Metabolism, Housing temperature, Exercise, Training adaptations, Mouse physiology, Insulin action

**Highlights**

- **Housing at 30°C blunts several adaptations to exercise training in mice**
- **Exercise-sensitive protein induction is dampened at 30°C in skeletal muscle**
- **30°C-housing blunts training-induced increase in insulin-stimulated glucose uptake**
- **Glucose tolerance is not improved by voluntary exercise training at 30°C housing**
- **Decreased running in 30°C housing is not due to overheating**

## Graphical abstract

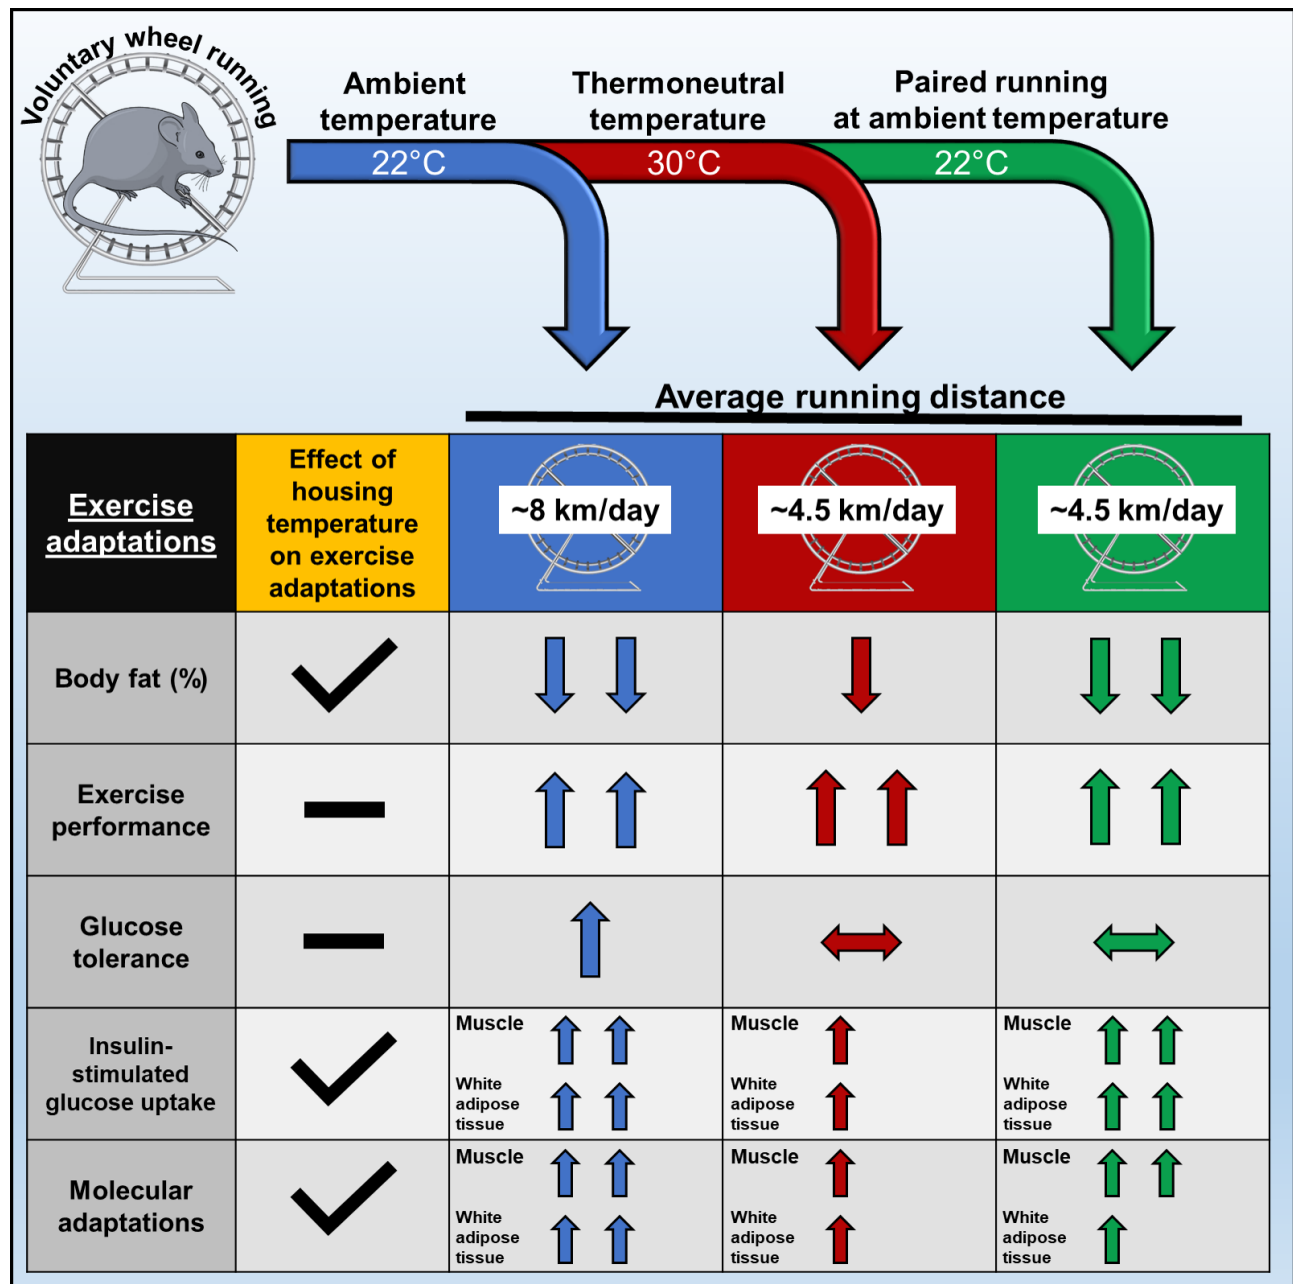

## 1 **Abstract**

2 Exercise training is a powerful means to combat metabolic pathologies. Mice are extensively used to  
3 describe the benefits of exercise, but mild cold stress induced by housing temperatures may confound  
4 translation to humans. Thermoneutral housing is a strategy to make mice more metabolically similar  
5 to humans but its effects on exercise adaptations are unknown. Using voluntary wheel running, we  
6 show that thermoneutral housing blunted exercise-induced improvements in insulin action in muscle  
7 and adipose tissue. Moreover, thermoneutrality reduced the effects of training on energy expenditure,  
8 body composition, muscle and adipose tissue protein expressions, and the gut microbiome. The  
9 majority of these thermoneutral-dependent training adaptations could not be ascribed to a lower  
10 voluntary running volume. Thus, we conclude that organismal adaptations to exercise training in mice  
11 critically depend upon housing temperature. Our findings underscore the importance of housing  
12 temperature as an important parameter in the design and interpretation of murine exercise studies.

## 13 **Introduction**

14 Physical inactivity is a leading cause of morbidity and premature mortality worldwide<sup>1,2</sup> and is  
15 associated with insulin resistance, obesity, and loss of muscle mass<sup>3</sup>. Regular exercise training is one  
16 of the most powerful means to combat such pathologies by eliciting health benefits on nearly all organ  
17 systems of the body<sup>4-6</sup>. Thus, much effort has been targeted towards understanding the underlying  
18 molecular mechanisms responsible for the adaptive responses to exercise training. In such studies,  
19 mice are extensively used as an experimental tool. However, failure to recognize that the laboratory  
20 mouse is housed under mild cold stress at ambient temperature<sup>7,8</sup> may confound data interpretation  
21 and translatability to humans, who primarily live at thermoneutrality<sup>9-11</sup>. Thus, it might be time to  
22 rethink the optimal conditions for performing exercise studies in murine models, starting by housing  
23 mice at thermoneutral conditions to avoid chronic cold stress and its potential effects on adaptations  
24 to exercise training.

25 Mice prefer housing temperatures at 30°C compared to 20°C and 25°C<sup>12</sup>. Indeed, mice housed at  
26 ambient temperatures experience adverse effects on overall metabolic health<sup>13</sup>. They display  
27 sevenfold higher metabolic rate compared to humans<sup>14</sup>, have two-fold increased heart rate compared  
28 to mice housed at thermoneutrality<sup>15</sup>, show non-shivering thermogenesis due to increased  
29 sympathetic drive and activation of brown adipose tissue<sup>8</sup>, and exist right at the cusp of immune  
30 suppression<sup>16</sup>. Experimentally these factors are obviously critical, although often underappreciated.  
31 Evidently, markedly dissimilar results have been obtained when testing the same processes in mice  
32 housed at different temperatures, including mitochondrial uncoupling<sup>17</sup>, whole-body glucose  
33 tolerance<sup>18,19</sup> (although recently contradicted by<sup>20</sup>), inflammation<sup>21</sup>, immune responses<sup>22</sup>,  
34 atherosclerosis<sup>23</sup>, and cancer<sup>24,25</sup>. Instead, optimal housing conditions of mice to better mimic the  
35 metabolic rate of humans have been studied and discussed in recent years with temperatures from  
36 27°C<sup>26</sup> to 30°C<sup>27,28</sup> being reported as the optimal housing temperature. Exercise markedly affects

37 metabolism but to the best of our knowledge, the voluntary wheel running mouse model of exercise  
38 training has never been tested at thermoneutral conditions.

39 Here we undertake a detailed comparison of voluntary wheel running as an Exercise Training model  
40 (ET) in mice housed at 22°C or 30°C. We show that housing temperature markedly influences the  
41 response to voluntary ET in skeletal muscle and adipose tissue, on glucose tolerance, insulin  
42 secretion, and the gut microbiome. Thus, our findings hold broad implications for assessing and  
43 interpreting systemic and molecular adaptive responses to voluntary training in mice at different  
44 housing temperatures.

## 45 **Results**

46 ***Exercise-induced changes in body composition and metabolic improvements are reduced at***  
47 ***thermoneutrality.***

48 To elucidate the effect of housing temperature on exercise adaptations in mice, we housed mice at  
49 22°C or 30°C with (Exercise Training; ET) or without (UnTrained; UT) free access to a running  
50 wheel for 6 weeks (excl. a 7-10 days temperature acclimatization period) (Fig 1A). This is one of the  
51 most commonly used training models for rodents often denoted *voluntary wheel running*. Body  
52 weight gain was similar between all groups during the 6 weeks intervention (Fig. 1B, Supplementary  
53 Fig. 1a) despite a 25% lower food intake in both ET and UT mice housed at 30°C, and a 30% increased  
54 food intake in both ET groups (Fig. 1C). At 30°C, ET attenuated gain in fat mass (-20%), while ET  
55 at 22°C, completely abolished fat mass gain (See Fig. 1D for body fat (%), See Suppl. Figure 1b for  
56 results in gram). For lean body mass, the opposite pattern was observed (see Fig 1E for LBM (%),  
57 see Suppl. Figure 1b for results in gram).

58 Throughout the intervention, mice housed at 30°C ran 60% of the distance completed by mice housed  
59 at 22°C (Fig. 1F). Thermoneutral housing (30°C) was recently shown to decrease exercise  
60 performance after just 7 days<sup>29</sup>. In the current study, no effect of 6 weeks of thermoneutral housing

61 could be detected on exercise performance in UT mice and in fact, ET elicited the same improvements  
62 (+35%) in maximal running speed (Fig. 1G), despite the 40% lower training volume at 30°C.

63 Having established that housing temperature altered ET adaptations on body composition but not  
64 exercise performance, we next asked whether housing temperature would affect the metabolic  
65 benefits to voluntary ET. Glucose tolerance improves following voluntary wheel running in mice<sup>30-</sup>  
66 <sup>32</sup>, but this has to the best of our knowledge only been tested for mice housed at 22°C. In contrast to  
67 ET at 22°C (Fig. 1H), ET at thermoneutral conditions did not improve glucose tolerance (Fig. 1I).  
68 This was despite a reduction in fat mass at both temperatures and improvements in running capacity  
69 by ET similar to what was seen at 22°C (Fig. 1D and G). We note that blood glucose during the  
70 glucose tolerance test (GTT) was noticeably lower in UT 30°C mice where it peaked at 12mM  
71 compared to UT 22°C mice where blood glucose peaked at 15mM. That suggests that the 30°C  
72 housing condition *per se* improves glucose tolerance in mice that could not be further improved by  
73 ET. In fact, glucose tolerance was similar between UT 30°C and ET 22°C housed mice (comparing  
74 Fig. 1H and I), which is in agreement with the notion that the standard control mouse at 22°C is less  
75 active and may be metabolically challenged<sup>13</sup>. In contrast to blood glucose, the 4-hour fasted plasma  
76 insulin concentration was similar between all experimental groups (Fig. 1J). Plasma insulin was  
77 reduced by ET in 22°C housed mice indicating improved insulin sensitivity, which was not observed  
78 in thermoneutrally housed ET mice (Fig. 1J). Interestingly, glucose-stimulated plasma insulin was  
79 40% higher in mice housed at 30°C compared to 22°C, suggesting that housing temperature  
80 significantly affects  $\beta$ -cell function and/or sensitivity and/or insulin clearance (Fig. 1J). This was  
81 supported by higher HOMA- $\beta$  in both UT and ET mice housed at 30°C (Suppl. Fig. 1c). HOMA-IR  
82 indicated improved insulin sensitivity by ET at 22°C ( $p=0.05$ ), while mice in 30°C generally exhibited  
83 lower HOMA-IR (Suppl. Fig. 1d). Thermoneutrally housed mice had fasting blood glucose of ~6mM,  
84 while 22°C housed mice had ~8mM and these were unaltered by ET (Fig. 1K). The plasma

85 triglyceride concentration (fasted) was 25% higher in 30°C housed mice compared to mice housed at  
86 22°C with no effect of ET (Fig. 1L). In UT mice, plasma free fatty acids (fasted) were 135% higher  
87 at 30°C than in 22°C, where ET led to a reduction only in 30°C (Fig. 1M).

88 ***Thermoneutral housing lowers energy expenditure and metabolic fluctuations in exercise-trained***  
89 ***mice.***

90 To further elucidate the impact of temperature on whole body adaptations to exercise training, we  
91 subsequently conducted a series of experiments in metabolic chambers. We first sought to investigate  
92 to what extent and how rapid the metabolism of mice changes when increasing housing temperature  
93 from 22°C to 30°C. Slowly raising the temperature over ~3 hours caused a rapid drop in oxygen  
94 uptake (VO<sub>2</sub>; Suppl. Fig. 1e) and respiratory exchange ratio (RER; Suppl. Fig. 1h) within 6 hours of  
95 temperature change. The change in temperature led to a decrease (-45%) in energy intake (Suppl. Fig.  
96 1f) without any changes in habitual activity (Suppl. Fig. 1g). These findings illustrate that housing  
97 temperature robustly and rapidly alters mouse metabolism. These results align with previous reports  
98 <sup>9,10,27,33</sup> and underline the metabolic challenges that are imposed on mice housed at room  
99 temperatures.

100 We next sought to determine the effects of temperature on whole body metabolism in mice already  
101 trained for 5 weeks (at 22°C or 30°C) by placing them in the metabolic chambers with or without  
102 access to a running wheel. Voluntary ET increased nightly VO<sub>2</sub> compared to UT mice in both  
103 temperatures, but the effect of nighttime in ET was 60% higher at 22°C compared to 30°C housed  
104 mice (Fig. 2A and B). As expected, RER showed diurnal rhythm at 22°C, where RER during the day  
105 was reduced in ET compared to UT mice (Fig. 2C). When housed at 30°C, RER was similar between  
106 day and night in untrained mice, in contrast with previous reports <sup>20,27</sup>, with no effect of ET on resting  
107 RER (Fig. 2C). Chronically housing mice at thermoneutrality increased habitual (+90%) activity  
108 during the night in UT mice (Fig. 2D) underlining the importance of adequate acclimatization time

109 during temperature changes, as acute temperature did not change habitual activity (Suppl. Fig. 1g).  
110 Increased habitual activity was despite lower food intake compared to UT mice at ambient  
111 temperature (Suppl. Fig. 1i). This contrasts with the nightly running volume that tended to remain  
112 lower ( $p=0.064$ , -35%, Fig. 2E) in mice housed at 30°C compared to ambient temperature, while  
113 running volume during daytime was increased at 30°C (Fig. 2F). Overall mice housed at 30°C ran  
114 35% less than when housed at 22°C ( $p=0.06$ , Fig. 2G) accompanied by a tendency to a lower maximal  
115 ( $p=0.054$ , Fig. 2H) and decreased average (Fig. 2I) running speed. To test if reduced running volume  
116 could be due to over-heating during exercise, we measured core temperature during the day (when  
117 the mice are resting/inactive) and in the early dark period (when the mice are running the most). UT  
118 mice displayed 0.6°C lower core temperature during the inactive period when housed at 22°C  
119 compared with 30°C, highlighting the mild cold stress inflicted by 22°C housing (Fig. 2J). Core  
120 temperature increased to the same absolute values in all groups during the dark period (Fig. 2J). Thus,  
121 reduced running of mice housed at 30°C is likely not due to overheating.

122 Overall, mice in 30°C displayed lower energy consumption, lesser improvements in body  
123 composition, as well as no improvement in glucose tolerance following the standard laboratory  
124 exercise model of voluntary wheel running, despite similar improvements in running performance.

125 ***Adaptations in glucose tolerance, but not performance or body composition, are ascribed to***  
126 ***training volume.***

127 Having established remarkable differences in exercise training adaptations with this model in mice  
128 housed at different temperatures, we next sought to determine if these alterations were due to the  
129 lower running volume in 30°C housed mice. Thus, we restricted voluntary running in mice housed at  
130 22°C (Fig. 3A) to mimic the training volume of thermoneutrally housed mice (“paired 22°C ET”, Fig.  
131 3B).



132 Body weight (Fig. 3C) and food intake (Fig. 3D) were unaffected by paired 22°C ET. Similar to 22°C  
133 housing (Fig. 1D), paired 22°C ET reduced fat mass gain (Fig. 3E). As such, mice training at 30°C  
134 showed higher body fat (Fig. 3E) and lower lean body mass relative to body weight (Fig. 3F)  
135 compared to mice training at 22°C. Thus, housing temperature altered ET adaptations on body  
136 composition independent of training volume. Alongside these observations, exercise capacity was  
137 improved to the same extent by paired 22°C ET when compared to both ET at 30°C and 22°C (Fig.  
138 3G). In contrast, paired 22°C ET did not improve glucose tolerance (Fig. 3H), suggesting that the  
139 differences between ET effects on glucose tolerance at different housing temperatures could be  
140 ascribed to training volume. However, plasma insulin concentrations were 15% lower in the paired  
141 ET compared to the UT group, suggesting that paired ET did in fact increase insulin sensitivity  
142 regardless of the lower running volume (Fig. 3I). No change in HOMA- $\beta$  or HOMA-IR was observed  
143 (Suppl. Fig. 2).

144 These data indicate that, apart from glucose tolerance, which could to some extent be ascribed to  
145 running volume, there is a direct effect of housing temperature on ET-induced body composition  
146 adaptations.

147 ***Thermoneutral housing prevents the improved insulin action in skeletal muscle following ET,***  
148 ***independently of running volume.***

149 We next investigated if housing temperature would affect the ET-induced adaptations on insulin  
150 action and glucose uptake in skeletal and cardiac muscle.

151 Insulin was injected in the retro-orbital vein in anaesthetized mice. Insulin caused a drop of blood  
152 glucose that was similar between all experimental groups (Fig. 4A, B, and C). Plasma insulin  
153 concentration was 1.8 ng/ml at tissue harvest, 10 min following the insulin injection, in all groups  
154 (Suppl. Fig. 3a).

155 Despite no apparent effect of ET on the change in whole body blood glucose levels during insulin  
156 stimulation, insulin-stimulated glucose uptake was increased by ET in skeletal muscle (m. triceps  
157 brachii (triceps), +40%, Fig. 4D) at 22°C. This effect was not observed following ET at 30°C (Fig.  
158 4D). This lack of ET-induced increase in muscle insulin-stimulated glucose uptake was ascribed to  
159 housing temperature, as the paired 22°C ET group exhibited increased insulin-stimulated muscle  
160 glucose uptake (+35%, Fig. 4D), in spite of the reduced running volume. Similar results were  
161 observed in quadriceps muscle (Suppl. Fig. 3b). Neither housing temperature nor ET affected insulin-  
162 stimulated glucose uptake in the heart (Fig. 4E). This was despite similar cardiac hypertrophy (+5%)  
163 after ET at both housing temperatures and a 9.5% reduction in heart mass in 30°C housed mice (Fig.  
164 4F). However, the mass of the heart was unaffected by ET in the paired 22°C ET group. Basal glucose  
165 uptake (Suppl. Fig. 3c) and importantly, 2-deoxy-glucose (<sup>3</sup>H) tracer activity were similar between  
166 all groups (Suppl. Fig. 3d). These results show that thermoneutral housing prevents the improved  
167 insulin action in skeletal muscle following ET, independently of running volume.

168 *Thermoneutrality alters the molecular adaptations to ET in skeletal muscle without affecting*  
169 *canonical insulin signaling.*

170 Major molecular adaptations occur in skeletal muscle in response to exercise training, but such  
171 responses have to the best of our knowledge in mice only been shown at ambient temperature. We  
172 therefore determined the molecular responses to voluntary ET on known training responsive proteins.  
173 In triceps muscle, GLUT4 (+20%), glycogen synthase (GS; +10%) and myoglobin (+20%) all  
174 increased with voluntary ET irrespective of housing temperature (Fig. 4G). In contrast, hexokinase  
175 (HK) II (+135%) and pyruvate dehydrogenase (PDH) (+60%) increased following ET only in 22°C  
176 housed mice (Fig. 4G, see 4I for representative blots). In the paired 22°C ET mice, ET increased HKII  
177 (30%), GS (10%, p=0.07), PDH (+45%), while no changes in GLUT4 and myoglobin were observed  
178 (see representative blots in Fig. 4J, for bar plots see Suppl. Fig. 3g).

179 It is well known that mitochondrial content increases with exercise training. To our surprise, we  
180 observed reduced response in four of the five complexes of the electron transport chain (ETC)  
181 following ET of 30°C housed mice compared to 22°C (Fig. 4H, see 4K for representative blots). The  
182 fact that housing temperature affects mitochondrial adaptations was confirmed by the paired 22°C  
183 ET mice, where all complexes increased after the intervention (see representative blots in Fig. 4L, for  
184 bar plots see Suppl. Fig. 3g).

185 We observed no effect of ET or temperature on protein expression of any of the above described  
186 proteins in heart muscle (Suppl. Fig. 3e). In addition, during insulin stimulation, no major changes in  
187 canonical insulin signaling were observed with ET or housing temperature in any of the analyzed  
188 muscles (Suppl. Fig. 3f). Housing temperature-induced changes in ET response observed in insulin-  
189 stimulated glucose uptake in skeletal muscle could therefore not be ascribed to altered intracellular  
190 insulin signaling, but rather changes in expression of glucose-handling proteins.

191 Collectively these data demonstrate that the ability of ET to increase insulin-stimulated glucose  
192 uptake and protein expression of key training responsive proteins in skeletal muscle were lost or  
193 markedly diminished when the mice were housed at 30°C, and this was not due to lower training  
194 volume.

### 195 ***Temperature-dependent adaptation of adipose tissue is not influenced by exercise training***

196 As white (WAT) and brown (BAT) adipose tissue are responsive to temperature<sup>34,35</sup> as well as ET at  
197 ambient temperature<sup>36,37</sup>, we next investigated if this also applied to ET in thermoneutral conditions.

198 The size of all analyzed fat depots was reduced similarly by ET in both temperatures (inguinal  
199 (i)WAT (-30%, Fig. 5A), epididymal (e)WAT (-40%, Fig. 5B), and BAT (-15%, Fig 5C). iWAT (Fig.  
200 5A) and eWAT (Fig. 5B) mass were unchanged by housing temperature, while BAT amount was  
201 doubled in thermoneutrally-housed mice (Fig. 5C) supporting a recent study<sup>20</sup>. Thermoneutrality  
202 lowered basal glucose uptake in BAT by 85% with no effect observed in WAT depots (Suppl. Fig.

203 4a). ET did not alter basal glucose uptake in any of the analyzed adipose tissue depots (Suppl. Fig.  
204 4a). ET in 22°C increased insulin-stimulated glucose uptake in iWAT, (+45%, Fig. 5D) and eWAT  
205 (+70%, Fig. 5E), but not in BAT (Fig. 5F). This response was unaffected by thermoneutral housing  
206 in eWAT but blunted by 30°C housing in iWAT. As seen for skeletal muscle, the differences in iWAT  
207 of ET-induced enhanced insulin action were ascribed to housing temperature rather than training  
208 volume ET also enhanced insulin action in iWAT in paired 22°C mice (Fig. 5D+E). 30°C housing  
209 led to an 80% reduction in insulin-stimulated glucose uptake in BAT compared to 22°C with no  
210 apparent effect of ET (Fig. 5F), and therefore the BAT from paired 22°C ET mice was not analyzed.  
211 To mechanistically explain the altered improvement in glucose uptake in adipose tissue, we analyzed  
212 the expression of glucose handling and insulin sensitive proteins. In iWAT, ET at 22°C led to  
213 increased HK II (+105%), GLUT4 (+105%), GS (+75%), and PDH (+95%), while only GLUT4  
214 (+50%,  $p=0.094$ ) and GS (+35%) increased after ET in 30°C (Fig. 5G). Like in muscle, HK II and  
215 PDH are thus potentially involved in the mechanisms behind the observed differences in insulin-  
216 stimulated glucose uptake in WAT. However, although showing tendencies for increased protein  
217 expression for most proteins investigated (incl. HK II and PDH), no significant effects were observed  
218 in the paired 22°C ET mice in iWAT (Suppl. Fig. 4b). Canonical insulin-stimulated signaling in  
219 iWAT was not affected by ET or housing temperature (data not shown), and thus could not explain  
220 the differences in insulin-stimulated glucose uptake. For BAT, only HK II (+45%) increased with ET  
221 in 22°C. In accordance with the lower insulin-stimulated glucose uptake in BAT at 30°C, we observed  
222 lower HK II (-90%), GLUT4 (-20%), and PDH (-30%) protein expression, while GS was unchanged  
223 (Fig. 5H).

224 Because adipose tissue phenotypes are highly sensitive to temperature<sup>34,35</sup> and ET has been reported  
225 to induce adipose tissue browning<sup>36,38</sup>, we analyzed gene expression of proteins involved in  
226 thermogenesis and mitochondrial uncoupling in iWAT and BAT. As expected, gene expression of

227 proteins involved in thermogenesis (*Ucp1*, *Cidea*, *Prdm16*, and *PGC-1 $\alpha$* ) were all downregulated by  
228 thermoneutral housing in all depots investigated (Suppl. Fig. 4c). These genes were largely unaffected  
229 by ET in both temperatures, likely due to the fact that the running wheels were locked for 24 hours  
230 prior to the terminal experiment. Indeed, ET increased protein content of four of five complexes of  
231 the electron transport chain in iWAT at 22°C in ET mice, but not at 30°C (Fig. 5I). Thus, paired 22°C  
232 ET only led to a significant increase in complex 3. Thus, both reduced running distance at  
233 thermoneutrality as well as temperature seem to underlie the differences in molecular adaptation to  
234 ET in iWAT. In BAT, only complex III increased (+25%) with voluntary ET and this occurred at  
235 both housing temperatures (Fig. 5J). Thermoneutral housing reduced complex I (-75%) and II (-65%)  
236 in BAT compared with 22°C (Fig. 5J). With strikingly no or only little effect observed of ET in BAT  
237 at either temperature and therefore likely not a key target for the observed phenotype in 30°C-housed  
238 mice, paired 22°C ET BAT was not investigated.

239 Despite having diminished molecular training adaptations in iWAT of the paired 22°C ET mice,  
240 increased insulin-stimulated glucose uptake was still observed in both ET-groups in iWAT of 22°C  
241 housing. Therefore, other unexplored or unknown mechanisms must underlie the observed effect on  
242 glucose metabolism in iWAT after ET. It emphasizes the importance of housing temperature when  
243 performing exercise training studies investigating fat depots and metabolism.

#### 244 ***Thermoneutral housing supersedes the effect of exercise on gut microbiome composition***

245 Metabolic health has during recent years been shown to be under strong influence by the gut  
246 microbiome (GM)<sup>39</sup>, and we therefore tested if housing temperature affects ET-induced gut  
247 microbiome adaptations.

248 GM diversity following the different interventions is visualized in a PCA plot (Fig. 6A). Both UT  
249 and ET mice showed significant differences in GM composition with distinct separation depending  
250 on housing temperature ( $R = 0.21$ ,  $p=0.001$ ). Forty-six phylotypes with a cumulative relative

251 abundance of up to 14%, differed significantly between the four experimental groups (Fig. 6B and  
252 C). These primarily belonged to family *Muribaculaceae* (40 phylotypes), a dominant bacterial group  
253 in the mouse gut<sup>40</sup>, followed by family *Lachnospiraceae* (3 phylotypes), species *Bacteroides*  
254 *uniformis* (2 phylotypes) and genus *Mobilisprobacter* (1 phylotype) (Fig. 6B and C).

255 With only four phylotypes changed with ET at 30°C and 19 changed in 22°C, the effect of housing  
256 temperature superseded the effect on GM compared to ET. However, four phylotypes, members of  
257 *Muribaculaceae*, were affected by both ET as well as housing temperature (Fig. 6B). These  
258 phylotypes have not been described at species level yet and additional studies are needed to define  
259 the role of these bacteria in relation to metabolism.

260 Significant positive and negative correlations between 676 phylotypes (a cumulative abundance of  
261 10.2% of the entire dataset) and insulin-stimulated glucose uptake of all analyzed tissues (apart from  
262 the heart) and fasting blood glucose were observed (Suppl. Fig.5). *Bacteroidaceae* (*B. uniformis*),  
263 *Porphyromonadaceae* (*P. distonis*), and *Ruminococcaceae* (*Oscillospira* spp.) and most  
264 *Bifidobacteriaceae* and *Coreobacteriaceae* members were all negatively correlated to these  
265 parameters (Suppl. Fig. 5).

266 The above data demonstrate that although ET alters the abundance of specific phylotypes at different  
267 housing temperatures, housing temperature of 30°C *per se* also causes a remarkably modification of  
268 the GM composition.

## 269 **Discussion**

270 The major finding in the current study was that housing temperature significantly alters systemic  
271 metabolic as well as molecular adaptations to voluntary wheel running exercise training in mice. In  
272 recent years, it has become evident that housing temperature markedly affects mouse metabolism and  
273 this complicates the translatability to humans. Notably, at ambient housing temperature over one-

274 third of total energy expenditure in mice is cold-induced thermogenesis<sup>41</sup>. In contrast, cold-induced  
275 thermogenesis contributes a very small fraction to total energy expenditure in humans<sup>42</sup>. Increasing  
276 housing temperatures (27°C - 30°C) improves the metabolic similarity between humans and mice and  
277 has been suggested to be a better housing strategy<sup>9,10,26,27,33</sup>. To the best of our knowledge, this is the  
278 first study to show that housing temperature markedly influences exercise training adaptations, clearly  
279 demonstrating that housing temperature is an important consideration when investigating such  
280 parameters in mice.

281 Most remarkably, the ET response on glucose metabolism was reduced by thermoneutral housing.  
282 ET at ambient temperature led to an increased glucose tolerance and improved insulin-stimulated  
283 glucose uptake in skeletal muscle in agreement with many previous reports<sup>43-51</sup>. However, this effect  
284 was absent in thermoneutrally housed mice. With regards to glucose tolerance, this could be ascribed  
285 to reduced running volume in thermoneutrally housed mice because paired 22°C mice, that ran the  
286 same distance as the 30°C mice, also did not improve glucose tolerance with training. However, the  
287 paired 22°C mice still improved insulin sensitivity as suggested by a reduced glucose-stimulated  
288 insulin response during the glucose tolerance test as well as improved insulin-stimulated skeletal  
289 muscle and iWAT glucose uptake. In contrast to glucose tolerance, the blunted ET-induced enhanced  
290 insulin-stimulated glucose uptake observed in 30°C housed mice, could be solely ascribed to housing  
291 temperature and not training volume. In addition, while 22°C-housing led to mild cold stress during  
292 day-time, the observed changes (running distance e.g.) were not due to overheating of 30°C-housed  
293 mice. Our finding that the voluntary wheel running model is less efficient in improving metabolic  
294 status in mice housed under thermoneutral conditions, could indicate that this is in fact not a good  
295 choice of housing condition when investigating molecular events underlying the metabolic benefits  
296 of exercise. On the other hand, at 22°C, the mouse has an extraordinarily high running volume, hardly  
297 mimicking a human exercise intervention. Combined with mild cold stress, such excessive exercise



298 regimes could mask or intensify potential effects when investigating a genetic model or  
299 pharmacological compound. This has indeed been observed for many other molecular mechanisms,  
300 where conclusions drawn from mice housed at 22°C have been completely changed when investigated  
301 at thermoneutrality<sup>17,19,21–24,52,53</sup>.

302 Another major finding of our study was that the molecular adaptations of key exercise responsive  
303 proteins were markedly altered by thermoneutrality, and this was not due to lower running volume.  
304 In triceps muscle, hexokinase II (responsible for upholding the glucose gradient across the membrane  
305 by phosphorylating entering glucose) and pyruvate dehydrogenase (converts pyruvate to acetyl-CoA  
306 connecting the glycolysis and the Krebs cycle) were only significantly upregulated by ET in ambient  
307 temperature, not thermoneutrality. This was also apparent for subunits of the electron transport chain  
308 in the mitochondria. Interestingly, these differences in mitochondrial adaptations in muscle and fat  
309 depots were not reflected in differences in improvements in exercise performance, as running capacity  
310 increased equally in all ET groups.

311 Metabolic ET-induced improvements are often associated with reduced adiposity<sup>54,55</sup>. In our study,  
312 ET reduced body-fat at both housing temperatures, although this was observed to a lesser extent at  
313 thermoneutrality. Interestingly, our paired running group elucidated that this difference was a cause  
314 of housing temperature and not training volume. A better effect of ET on reducing adiposity at 22°C  
315 is likely due to the much higher metabolic demand on mice at 22°C that, because of mild cold stress,  
316 exhibit increased energy expenditure as has been described previously in UT mice<sup>56</sup>. Our metabolic  
317 measurements of mice during voluntary wheel running at different temperatures showed, that mice  
318 running at ambient temperature have much higher oxygen consumption, and thereby also increased  
319 energy usage. This could be a contributing factor for a lower body fat percentage seen in trained mice  
320 at 22°C compared to 30°C. Virtue and colleagues (2012) have found somewhat opposite results



321 showing that mice running at 28°C displayed higher energy usage per wheel turn compared to 21°C<sup>57</sup>.  
322 However, in that study, the mice were not habituated to thermoneutral temperatures prior to the  
323 experiment, which might explain the discrepancy.

324 In addition to a reduced metabolic rate, mice housed at 30°C did not increase their RER during the  
325 dark cycle. A lower RER is indicative of higher relative contribution of fat oxidation. Taken together  
326 with the observed higher FFA and TG levels of 30°C-housed mice (in agreement with a previous  
327 report<sup>20</sup>), the data from current study shows that fat metabolism might also be highly affected by  
328 housing temperatures and warrants further investigations.

329 Although not a key objective of the study, we found generic differences between housing  
330 temperatures in our untrained mice that to the best of our knowledge have not previously been  
331 documented. An important finding in our study was that the mouse gut microbiome was remarkably  
332 affected by housing temperature with minimal effect of ET. The small effect size of ET on GM  
333 contrasts previous observations<sup>58,59</sup>. The effect of temperature is important as the gut microbiome  
334 has been shown to affect several functions in physiology, e.g. glucose metabolism<sup>60-62</sup>, and has  
335 recently been associated with muscle function<sup>63</sup>. This effect of housing temperature alone has not to  
336 our knowledge been clearly demonstrated previously.

337 Increasing housing temperature also led to a ~10% reduction in heart mass, suggesting that ambient  
338 housing leads to cardiac hypertrophy, likely due to a higher cardiac stress as indicated by twice as  
339 high heart rate at 22°C (600bpm) compared to 30°C (300bpm) housed mice<sup>15,64,65</sup>.

340 In addition to a lower fasting blood glucose of thermoneutrally housed mice as observed previously<sup>19</sup>,  
341 we also observed that thermoneutral housing lead to elevated insulin secretion following a glucose  
342 challenge. To what extent housing temperature alters pancreatic morphology or function is unknown  
343 and needs further investigation. Based on our findings, housing temperature may affect the outcome

344 of studies investigating all of these processes, the interpretation of the results, and ultimately the  
345 translation to humans.

346 Contemporary biomedical research is using proteomic analysis to comprehensively explore the global  
347 regulations to map the beneficial changes that occurs with exercise training<sup>49,66-68</sup>. Such studies will  
348 need to be followed up by hypothesis-driven research genetically manipulating or pharmacologically  
349 inhibiting/activating a pathway of interest in order to elucidate the mechanistic role for a given  
350 exercise training-regulated protein or process. Considering the optimal housing condition for such  
351 studies might increase the translatability and clinical relevance for humans.

## 352 **Conclusion**

353 In conclusion, we show that numerous training adaptations are influenced by housing temperature; the  
354 majority of which was not ascribed to a lower voluntary running volume in thermoneutrally-housed  
355 mice. Our findings highlight that organismal and molecular adaptations to exercise training in mice  
356 depend upon housing temperature and that housing temperature is important to consider when using  
357 mice as an experimental model.

## 358 **Additional information**

359 **Competing interests.** None declared

360 **Author contributions.** S.H.R., L.S., and E.A.R. conceptualized and designed the study. S.H.R. and  
361 L.S. conducted the experiments, performed the laboratory analysis, analyzed the data, and wrote the  
362 manuscript. C.H.O., I.K., M.A., L.L.V.M., W.K., J.L.C.M., D.S.N., and Z.G.H. all took part in  
363 conducting the experiments, performing laboratory analysis and/or interpreting the data. All authors  
364 commented on and approved the final version of the manuscript. L.S. is the guarantor of this work  
365 and, as such, has full access to all the data in the study and takes responsibility for the integrity of the  
366 data and the accuracy of the data analyses.

367 **Funding.** L.S. and E.A.R. were supported by the Danish Council for Independent Research, Medical  
368 Sciences (grant DFF-4004-00233 to LS, grant 6108-00203 to EAR); The Novo Nordisk Foundation  
369 (grant 10429 to EAR, grant NNF16OC0023418 and NNF18OC0032082 to LS). L.L.V.M. was  
370 supported by the PhD fellowship from The Lundbeck Foundation (grant 2015-3388 to LLVM).

371 **Acknowledgements.** We acknowledge the skilled technical assistance of Betina Bolmgren and Irene  
372 Bech Nielsen (Molecular Physiology Group, Department of Nutrition, Exercise and Sports,  
373 University of Copenhagen, Denmark).

## 374 **Material and methods**

### 375 *Animals*

376 10-week old female C57BL/6J mice (Taconic, Lille Skensved, Denmark) were maintained on a  
377 12:12-h light-dark cycle and received standard rodent chow diet (Altromin no. 1324; Chr. Pedersen,  
378 Denmark) and water ad libitum with nesting materials. All experiments were approved by the Danish  
379 Animal Experimental Inspectorate (Licence; 2016-15-0201-01043). Mice were randomly assigned to  
380 ambient temperature ( $22^{\circ}\text{C}\pm 1^{\circ}\text{C}$ ) or thermoneutrality ( $30^{\circ}\text{C}\pm 1^{\circ}\text{C}$ ) in different rooms in the same  
381 animal facility. After a 7-10 day acclimatization period, mice were pair-housed and housed with or  
382 without free access to running wheels for 6 weeks. Running distance was recorded for each cage  
383 twice weekly. Core temperature was measured with a rectal thermometer at 1:00pm (light period) and  
384 9:00pm (most active dark period). For paired exercise training mice were housed at ambient  
385 temperature with wheels that were locked from 00.00am-5:00pm. Running wheels were locked 24  
386 hrs before glucose tolerance tests and terminal procedures to avoid any residual effects of acute  
387 exercise.

### 388 *Maximal running capacity*

389 Mice were acclimated to the treadmill three times (10 min at 0.16 m/s) within a week prior to the  
390 maximal running tests. The maximal running test started at 0.16 m/s for 300 s with 15° incline,  
391 followed by a continuous increase (0.2 m/s) in running speed every 60s until exhaustion (Treadmill  
392 TSE Systems, Germany).

### 393 *Body composition*

394 Total, fat and lean body mass were measured weekly by nuclear magnetic resonance using an  
395 EchoMRI<sup>TM</sup>(USA).

396

397 ***Metabolic chambers***

398 After a 3-day acclimation period in the metabolic cages, oxygen consumption, ambulant activity  
399 (beam breaks), food intake and running distance/speed were measured by indirect calorimetry in a  
400 CaloSys apparatus during at least 2 days (TSE Systems, Bad Homburg, Germany). To test the acute  
401 effects of thermoneutrality, a group of mice were housed in the metabolic chambers at 22°C for 3  
402 days followed by an increase in the temperature to 30°C for 3 days. All mice were single-housed  
403 during housing in metabolic cages.

404 ***Glucose tolerance test***

405 Glucose (2.0 g/kg) was intraperitoneally injected into 5-hr-fasted (fasting from 7:00AM) mice. Blood  
406 was collected from the tail vein at time points 0, 20, 40, 60, 90 and 120 min and analyzed for glucose  
407 using a glucometer (Bayer Contour; Bayer, Münchenbuchsee, Switzerland). At time point 0 and 20  
408 min, insulin was analyzed in duplicates in plasma (#80-INSTRU-E10; ALPCO Diagnostics).

409 ***In vivo insulin-stimulated <sup>3</sup>H-2-DG uptake***

410 To determine 2-deoxyglucose (2-DG) uptake in muscle, [<sup>3</sup>H]2-DG (Perkin Elmer) was injected retro-  
411 orbitally in a bolus of saline containing 66.7 μCi/mL [<sup>3</sup>H]2DG corresponding to ~9-10 μCi/mouse (6  
412 μL/g body weight) in chow. The injectate also contained 0.3 U/kg body weight insulin (Actrapid;  
413 Novo Nordisk, Bagsværd, Denmark) or a comparable volume of saline. Prior to stimulation, mice  
414 were fasted for 3 h from 07:00am and anaesthetized (intraperitoneal injection of 7.5 mg pentobarbital  
415 sodium/100 g body weight) for 15 min. Blood samples were collected from the tail vein immediately  
416 prior to insulin or saline injection and after 5 and 10 min and analyzed for glucose concentration using  
417 a glucometer (Bayer Contour; Bayer, Münchenbuchsee, Switzerland). After 10 min, all tissues were  
418 excised, weighed (fat depots only), and quickly frozen in liquid nitrogen and stored at -80°C until  
419 processing. Blood was collected by punctation of the heart, centrifuged and plasma frozen at -80°C.

420 Plasma samples were analyzed for insulin concentration and specific [<sup>3</sup>H]2DG tracer activity. Tissue  
421 specific 2DG uptake was analyzed as previously described (Fueger et al. 2004; Raun et al. 2018).

422 **Plasma analysis.** Plasma insulin concentration was analyzed in duplicates in plasma (#80-INSTRU-  
423 E10; ALPCO Diagnostics). Plasma triacylglyceride (TG) was analyzed in duplicates in plasma  
424 (#Triglycerides CP, Horiba ABX). Plasma free fatty acids (FFA) were analyzed in duplicates in  
425 plasma (#NEFA C ACS-ACOD, Wako Chemicals).

426 **Tissue processing.** Muscles were pulverized in liquid nitrogen and homogenized 2 × 0.5 min at 30  
427 Hz using a TissueLyser II bead mill (Qiagen, USA) in ice-cold homogenization buffer (10% glycerol,  
428 1% NP-40, 20 mM sodium pyrophosphate, 150 mM NaCl, 50 mM HEPES (pH 7.5), 20 mM β-  
429 glycerophosphate, 10 mM NaF, 2 mM phenylmethylsulfonyl fluoride (PMSF), 1 mM EDTA (pH  
430 8.0), 1 mM EGTA (pH 8.0), 2 mM Na<sub>3</sub>VO<sub>4</sub>, 10 μg mL<sup>-1</sup> leupeptin, 10 μg mL<sup>-1</sup> aprotinin, 3 mM  
431 benzamidine). Following end-over-end rotation for 30 min at 4°C, the samples were centrifuged  
432 (10,000rpm) for 20 min at 4°C. Thereafter, the supernatants (clear lysate) were collected and stored  
433 at -80°C. The latter two steps (centrifugation and lysate collection) were performed three times in  
434 adipose tissue to avoid contamination of fatty acids.

435 **Immunoblotting.** Lysate protein concentrations were measured using the bicinchoninic acid (BCA)  
436 method with bovine serum albumin (BSA) as standard. Total protein and phosphorylation levels of  
437 relevant proteins were determined by standard immunoblotting techniques loading equal amounts of  
438 protein. The primary antibodies used are presented in Table 1. Polyvinylidene difluoride membranes  
439 (Immobilon Transfer Membrane; Millipore) were blocked in Tris-buffered saline (TBS)-Tween 20  
440 containing 2% milk protein for 5 min at room temperature. Membranes were incubated with primary  
441 antibodies overnight at 4°C, followed by incubation with horseradish peroxidase-conjugated  
442 secondary antibody for 45 min at room temperature. Coomassie brilliant blue staining was used as a

443 loading control <sup>69</sup>. Bands were visualized using the Bio-Rad ChemiDoc MP Imaging System and  
444 enhanced chemiluminescence (ECL+; Amersham Biosciences).

445 **Antibody table 1**

| Antibody               | Source                                              | Catalog number (#) |
|------------------------|-----------------------------------------------------|--------------------|
| Akt Ser473             | Cell Signaling Technology                           | 4051               |
| Akt2                   | Cell Signaling Technology                           | 3063               |
| TBC1D4 Thr642          | Cell Signaling Technology                           | 4288               |
| HK II                  | Cell Signaling Technology                           | 2867               |
| Myoglobin              | Cell Signaling Technology                           | 25919              |
| GLUT4                  | Thermo Fisher Scientific                            | PA1-1065           |
| TBC1D4                 | Abcam                                               | Ab189890           |
| OXPHOS                 | Abcam                                               | 110413             |
| Glycogen Synthase      | Oluf B. Pedersen, University of Copenhagen, Denmark |                    |
| Pyruvate Dehydrogenase | Grahame Hardie, University of Dundee, UK            |                    |

446

447 **qPCR analysis.** Total RNA was extracted from BAT, iWAT and eWAT depots using TRI reagent  
448 (T9424, Sigma-Aldrich) followed by isolation using RNeasy Mini Kit (74106, Qiagen). Reverse  
449 transcription was carried out on 1000 ng RNA using the High Capacity cDNA Reverse  
450 Transcription kit (4368814, Applied Biosystems). Gene expression was determined based on real-  
451 time quantitative PCR using SYBR green (PP00259, Primerdesign). The data was analyzed with the  
452  $\Delta\Delta$ CT method and normalized to the housekeeping gene 36b4. All primers are listed in Table 2.

453 **Primer table 2**

| Gene              | Forward primer (5'→3')     | Reverse primer (5'→3')      |
|-------------------|----------------------------|-----------------------------|
| <i>Ucp1</i>       | GGATTGGCCTCTACGACTCA       | TAAGCCGGCTGAGATCTTGT        |
| <i>pan-Pgcl1a</i> | TGATGTGAATGACTTGGATACAGACA | GCTCATTGTTGTAAGTGGTTGGATATG |
| <i>Prdm16</i>     | CCTGTGGGAGTCCTGAAAGA       | CAGCTTCTCCGTCATGGTTT        |
| <i>Cidea</i>      | GTCAAAGCCACGATGTACGA       | CAGGAAGTGTCCCCTCATCT        |

454

455

456 ***Microbiota analysis***

457 **Samples collection, processing and DNA extraction.** Caecum fecal samples were collected from  
458 sedated mice during the terminal experiment with R.O. injections. Approximately 200 mg of the  
459 caecal content were used for DNA extraction using the PowerSoil® DNA Isolation Kit (MOBIO  
460 Laboratories, Carlsbad, CA, USA), following the instructions of the manufacturer, but with minor  
461 modifications. Briefly, prior DNA extraction, samples were placed into the PowerBead tubes and heat  
462 treated at 65°C for 10 min and then at 95°C for 10 min. Subsequently, solution C1 was added and  
463 bead-beating performed in FastPrep (MP Biomedicals, Santa Ana, CA, USA) using 3 cycles of 15 s  
464 each, at a speed of 6.5 m s<sup>-1</sup>. The remaining DNA extraction procedure followed the manufacturer's  
465 instructions.

466 **High-throughput 16S rRNA gene amplicon sequencing.** Gut microbiome composition was  
467 determined by high-throughput 16S rRNA gene amplicon sequencing. The primers designed with  
468 adapters Nextera Index Kit® (Illumina, CA, USA) targeted the V3 region (~190 bp) and the library  
469 preparation, purification and sequencing were performed as previously described<sup>70</sup>. Briefly, the  
470 amplification profile (1<sup>st</sup> PCR) followed: Denaturation at 95°C for 2 min; 33 cycles of 95°C for 15 s,  
471 55°C for 15s and 68°C for 40 s; followed by final elongation at 68°C for 5 min, while barcoding (2<sup>nd</sup>  
472 PCR) was performed at 98°C for 1 min; 12 cycles of 98°C for 10 s, 55°C for 20 s and 72°C for 20 s;  
473 elongation at 72°C for 5 min. The amplified fragments with adapters and tags were purified and  
474 normalized using custom made beads, pooled and subjected to 150 bp pair-ended NextSeq (Illumina,  
475 CA, USA) sequencing.

476 Sequencing of the 16S rRNA gene (V3-region) amplicons yielded 3,434,893 high quality reads (mean  
477 sequence length of 183 bp) and the number of reads per sequenced sample varied from 50,140 to  
478 141,905 with an average of 85,872 (SD 20,246).



479 **Processing of high throughput sequencing data.** The raw dataset containing pair-ended reads with  
480 corresponding quality scores were merged and trimmed using the following settings, -fastq\_minovlen  
481 100, -fastq\_maxee 2.0, -fastq\_truncal 4, -fastq\_minlen 130. De-replicating, purging from chimeric  
482 reads and constructing *de-novo* zero-radius Operational Taxonomic Units (zOTU) was conducted  
483 using the UNOISE pipeline <sup>71</sup> coupled to the EZtaxon 16S rRNA gene collection as a reference  
484 database <sup>72</sup>.

#### 485 *Statistical Analyses*

486 The data are expressed as mean  $\pm$  SEM and individual data points (when applicable) and analyzed  
487 using GraphPad Prism 8. Statistical tests were performed using paired/non-paired t-tests or  
488 repeated/no-repeated two-way ANOVA as applicable. Multiple repeated Two-way ANOVAs were  
489 performed in analyses including all experimental groups testing for the effect of temperature within  
490 training groups or the effect of exercise training within each temperature. Sidak post-hoc test was  
491 performed when ANOVA revealed significant main effects and interactions. Microbiome analyses;  
492 For downstream analyses the dataset (based on zOTUs phylotypes) was subsampled with 50,000  
493 reads. Principal Coordinates Analysis (PCoA) based on Bray-Curtis distances (based on 10 distance  
494 metrics and determined by 10 subsampled zOTU tables) and differences between experimental  
495 groups were evaluated using analysis of variance on distance matrices (Adonis). Differences in  
496 relative distribution among phylotypes were determined through Student's *t*-test, while correlations  
497 of phylotypes with measurements for insulin-stimulated glucose uptake were determined with  
498 Pearson Correlation Coefficients. These analyses were bootstrapped with 100 permutations and *p*-  
499 values corrected for Type I error with False Discovery Rate (FDR).

500

501

## 502 **Figure legends**

### 503 **Figure 1: Voluntary exercise training in thermoneutrality induces smaller improvements on whole-body** 504 **adaptations compared to 22°C.**

505 (A): graphic illustration of experimental training model. Mice were acclimatized to housing temperature before  
506 completing a 6 weeks voluntary wheel running exercise training (ET) intervention. (UT= untrained)

507 (B): The effect of housing temperature and ET in 22°C and 30°C on bodyweight. n=8-10.

508 (C): The effect of housing temperature and ET in 22°C and 30°C on food intake. Values are the average over 3 days of 3  
509 different weeks from 4-5 cages. n=4-5. Effect of ET within temperature; \*\* p<0.01. Effect of temperature within UT or  
510 ET; # p<0.05, ## p<0.01.

511 (D-E): The effect of housing temperature and ET in 22°C and 30°C on body fat (%) and lean body mass (%). n=8-10.  
512 Effect of time within group; \$ p<0.05, \$\$\$ p<0.001. Effect of temperature within ET-groups (post); # p<0.05. Effect of  
513 ET within temperature; \* p<0.05, \*\*\* p<0.001.

514 (F): Running distance per day in 22°C and 30°C, respectively. n=10. Effect of temperature; ### p<0.001.

515 (G): Exercise capacity before (Pre) and after (Post) the training intervention. n=8-10. Effect of time within group; \$\$\$  
516 p<0.001. Effect of ET within temperature; \*\*\* p<0.001.

517 (H-I): Effect of ET at 22°C and 30°C on glucose tolerance. n=8-10. Effect of ET on blood glucose response; \* p<0.05,  
518 \*\*\* p<0.001. Effect of ET on iAUC; \* p<0.05.

519 (J): Effect of ET at 22°C and 30°C on glucose-stimulated insulin secretion at time 0min and 20min. n=8-10. Effect of  
520 time within group; \$ p<0.05. Effect of temperature within UT or ET-groups (post); # p<0.05. Effect of ET within  
521 temperature; \* p<0.05.

522 (K): Fasting blood glucose after 5 hrs. of fasting. n=8-10. Effect of temperature within UT or ET; ### p<0.001.

523 (L-M) The effect of housing temperature and ET in 22°C and 30°C plasma triglyceride and free fatty acids. n=8-10. Effect  
524 of temperature; # p<0.05, ## p<0.01. Effect of ET within temperature; \* p<0.05.

525 Data are presented as mean ± SEM incl. individual values where applicable.

### 526 **Figure 2: Housing temperature markedly affects the metabolic responses to exercise training in mice.**

527 (A-C): VO<sub>2</sub> and RER in untrained (UT) and voluntary wheel running exercise trained (ET) mice at 22°C and 30°C  
528 housing. n=5-8. Effect of time within group; \$\$\$ p<0.001. Effect of temperature within time of day; # p<0.05, ## p<0.01,  
529 ### p<0.001. Effect of ET within temperature; \*\* p<0.01, \*\*\* p<0.001.

530 (D): Habitual activity (2 consecutive days) in UT mice after 6 weeks temperature acclimatization. n=5-8. Effect of time  
531 within group; \$\$\$ p<0.001. Effect of temperature within time of day; # p<0.05.

532 (E-I): Effect of temperature on wheel running distance, maximum and average speed. n=6-7. Effect of temperature; #  
533 p<0.05, ## p<0.01, (#) p<0.1.

534 (J): Core temperature was measured at day (light period) and night (dark period) time via rectal thermometer, Effect of  
535 time, day vs. night; \$ p<0.05, \$\$ p<0.01. Effect of temperature within day; # p<0.05.

536 Data are presented as mean ± SEM incl. individual values where applicable.

537

538 **Figure 3: Training volume cannot account for the differences in exercise training responses in different**  
539 **housing temperatures.**

- 540 (A): Graphical illustration of the paired 22°C voluntary wheel running exercise training (ET) intervention.  
541 (B): Running distance per day in 22°C, 30°C, and paired 22°C, respectively. n=5-10. Effect of temperature; ### p<0.001.  
542 (C): The effect of paired 22°C ET on bodyweight. n=10.  
543 (D): The effect of paired 22°C ET on food intake. Values are the average over 3 days of 3 different weeks from 5 cages.  
544 (E-F): The relative change in body fat (%) and lean body mass (%) from before to after the ET intervention in 22°C, 30°C,  
545 and paired 22°C. n=10. Effect between the groups as indicated with lines; # p<0.05, ## p<0.01.  
546 (G): Running capacity before and after the ET intervention in 22°C, 30°C, and paired 22°C. n=10. Effect of time within  
547 group; \$\$\$ p<0.001.  
548 (H): Effect of paired 22°C ET on glucose tolerance. n=10.  
549 (I): Effect of paired 22°C ET on glucose-stimulated insulin secretion at time 0min and 20min. n=10. Effect of time within  
550 group; \$\$ p<0.01, \$\$\$ p<0.001. Effect of ET; \*\*\* p<0.001.  
551 Data are presented as mean ± SEM incl. individual values where applicable.

552 **Figure 4: Skeletal muscle shows lesser improvements in insulin action and molecular adaptations after**  
553 **exercise training at thermoneutrality.**

- 554 (A-C): Effect of retro-orbital insulin injection (0.3U/kg) on blood glucose in 22°C (A), 30°C (B), and paired 22°C (C),  
555 untrained (UT) and voluntary wheel running exercise trained (ET). n=10-14. Effect of time (insulin); \$\$\$ p<0.001.  
556 (D-E): Effect of ET on insulin-stimulated glucose uptake in 22°C, 30°C, and paired 22°C in skeletal muscle (m. triceps  
557 brachii) (D) and cardiac muscle(E). n=8-10. Effect of ET within temperature; \* p<0.05. Effect of temperature within ET  
558 groups; ## p<0.01.  
559 (F): Effect of ET on cardiac muscle weight in 22°C, 30°C, and paired 22°C (UT and ET groups). n=10-18. Main-effect  
560 of ET; \* p<0.05. Main-effect of temperature; # p<0.05.  
561 (G-H): Effect of ET on training responsive proteins (G) and subunits of the electron transport chain of the mitochondrion  
562 (H) in triceps muscle at 22°C and 30°C. n=8-10. Effect of ET within temperature; \* p<0.05, \*\* p<0.01, \*\*\* p<0.001.  
563 Effect of temperature within UT or ET groups; ## p<0.01, ### p<0.001.  
564 (I-L): Representative blots of proteins investigated in (G-H) and paired 22°C ET (J and L). Quantitative bar-blots of J and  
565 L can be seen in Appendix. Fig. 3.  
566 Data are presented as mean ± SEM incl. individual values where applicable.

567 **Figure 5: Exercise training improves insulin-stimulated glucose uptake in white adipose tissue to a**  
568 **greater extent when performed in ambient temperature.**

- 569 (A-C): Effect of voluntary wheel running exercise training (ET) on fat depot weight (iWAT (A), eWAT (B), and BAT(C))  
570 at 22°C, 30°C, and paired 22°C, UT (untrained) and ET respectively. n=8-10. Effect of ET within temperature; \* p<0.05,  
571 \*\* p<0.01, \*\*\* p<0.001. Main-effect of temperature; ### p<0.001.  
572 (D-F): Effect of ET on insulin-stimulated glucose uptake in 22°C, 30°C, and paired 22°C in iWAT (D), eWAT (E), and  
573 BAT (F). n=10-14. Effect of ET within temperature; \* p<0.05, \*\* p<0.01. Effect of temperature as indicated with lines;  
574 ## p<0.01, ### p<0.001.  
575 (G-J): Effect of ET on training responsive proteins in iWAT (G) and BAT (H) at 22°C and 30°C, and the effect of ET on  
576 subunits of the electron transport chain of the mitochondrion in iWAT (I) and BAT (J) at 22°C and 30°C. Representative  
577 blots are shown as indicated. n=8-10. Effect of ET within temperature; \* p<0.05, \*\* p<0.01, \*\*\* p<0.001. Main-effect of  
578 temperature within UT and ET groups; ## p<0.01, ### p<0.001. Parenthesis indicates p<0.1.  
579 Data are presented as mean ± SEM incl. individual values where applicable.

580 **Figure 6: Thermoneutral housing supersedes the effect of exercise on gut microbiome composition.**

581 (A) Housing mice at 30°C markedly alters gut microbiome composition with minor effect of exercise training. Bray-  
582 Curtis distance based PCoA plot of cecal 16S rRNA gene (V3-region) amplicons (zOTU level). The groups are  
583 separated by the colors indicated in the figure. Adonis test determined differences between experimental groups [ $R^2 =$   
584  $0.21$ ,  $p$ -val =  $0.001$ ], where a clear separation between mice housed at 22°C and 30°C was observed.  $n = 8-10$ .

585 (B) Specific phylotypes (summarized with zOTUs) were differentially regulated by housing temperature and exercise  
586 training.  $t$ -test ( $FDR$   $p$ -val  $\leq 0.05$ ).  $n = 8-10$ .

587 (C) Relative abundance of zOTUs summarized to the species level as indicated.  $n = 8-10$ .

588 **Figure legends (Appendix, supplementary data)**

589 **A1: For figure 1 and 2**

590 (a) The effect of housing temperature and ET in 22°C and 30°C on bodyweight (gram).  $n = 8-10$ .

591 (b) The effect of housing temperature and ET in 22°C and 30°C on body fat (gram) and lean body mass (gram).  $n = 8-10$ .  
592 Effect of time within group; \$  $p < 0.05$ , \$\$\$  $p < 0.001$ . Effect of temperature within ET-groups (post); #  $p < 0.05$ . Effect of  
593 ET within temperature; \*  $p < 0.05$ , \*\*\*  $p < 0.001$ .

594 (c-d) HOMA- $\beta$  (beta-cell sensitivity) and HOMA-IR (whole body) measured from basal plasma glucose and insulin.  $n = 8-$   
595  $10$ . Effect of temperature; ###  $p < 0.001$ .

596 (e-h): The effect of acute change of temperature from 22°C to 30°C on oxygen uptake ( $VO_2$ ) food intake, ambulant  
597 activity (2 consecutive days), and RER.  $n = 9$ . Effect of time; ##  $p < 0.01$ , ###  $p < 0.001$ .

598 (i): Food intake in ET mice housed in metabolic chambers. Effect of ET; \*\*\*  $p < 0.001$ . Effect of temperature; ###  $p < 0.001$   
599 ( $n = 5-8$ ).

600 Data are presented as mean  $\pm$  SEM incl. individual values where applicable.

601 **A2: for Figure 3**

602 HOMA- $\beta$  (beta-cell sensitivity) and HOMA-IR (whole body) measured from basal plasma glucose and insulin.  $n = 10$

603 Data are presented as mean  $\pm$  SEM incl. individual values where applicable.

604 **A3: for Figure 4**

605 (a) Plasma insulin after retro-orbital insulin injection (at min 10).  $n = 8-10$ , Two-way ANOVA.

606 (b) Effect of ET on insulin-stimulated glucose uptake in 22°C, 30°C, and paired 22°C in skeletal muscle (m. quadriceps).  
607  $n = 8-10$ . Effect of ET within temperature; \*  $p < 0.05$ .

608 (c) Basal glucose uptake in all experimental groups.  $n = 6$

609 (d) 2-DG plasma tracer counts of all experimental groups

610 (e) Effect of ET on training responsive proteins and subunits of the electron transport chain of the mitochondrion in triceps  
611 muscle at 22°C and 30°C.  $n = 8-10$ . Effect of ET within temperature; \*  $p < 0.05$ , \*\*  $p < 0.01$ , \*\*\*  $p < 0.001$ . Effect of  
612 temperature within UT or ET groups; ##  $p < 0.01$ .

613 (f) Representative blots of canonical insulin signaling in all muscles investigated.

614 (g) Bar plots of paired 22°C ET immunoblotting analyses. Representative blots can be seen in figure 4.  $n = 10$ . Effect of  
615 ET; \*  $p < 0.05$ , \*\*  $p < 0.01$ , \*\*\*  $p < 0.001$ .

616 Data are presented as mean  $\pm$  SEM incl. individual values where applicable.

617 **A4: for Figure 5**

618 (a) Basal glucose uptake in all experimental groups. n=6

619 (c) Bar plots of immunoblotting analyses of paired 22°C ET of iWAT.

620 (b) Thermo-regulatory genes in iWAT and BAT depots. n=7-10. Effect of ET within temperature; \* p<0.05. Effect of  
621 temperature within UT or ET groups; ## p<0.01, ### p<0.001, parenthesis; p<0.1.

622 Data are presented as mean  $\pm$  SEM incl. individual values where applicable.

623 **A5: for Figure 6**

624 (A) Heat-map displaying Pearson Correlation Coefficients (FDR  $p$ -val  $\leq$  0.05) between measurements of insulin-  
625 stimulated glucose uptakes and the relative abundance of 676 GM phylotypes. Blue color indicates negative correlation.  
626 Red color indicates positive correlation.

627 **Bibliography**

- 628 1. Arem, H. *et al.* Leisure time physical activity and mortality: a detailed pooled analysis of the  
629 dose-response relationship. *JAMA Intern. Med.* **175**, 959–67 (2015).
- 630 2. Booth, F. W., Roberts, C. K. & Laye, M. J. Lack of exercise is a major cause of chronic  
631 diseases. *Compr. Physiol.* **2**, 1143–211 (2012).
- 632 3. Booth, F. W., Gordon, S. E., Carlson, C. J. & Hamilton, M. T. Waging war on modern  
633 chronic diseases: primary prevention through exercise biology. *J. Appl. Physiol.* **88**, 774–87  
634 (2000).
- 635 4. Neufer, P. D. *et al.* Understanding the Cellular and Molecular Mechanisms of Physical  
636 Activity-Induced Health Benefits. *Cell Metab.* **22**, 4–11 (2015).
- 637 5. Sylow, L., Kleinert, M., Richter, E. A. & Jensen, T. E. Exercise-stimulated glucose uptake -  
638 regulation and implications for glycaemic control. *Nat. Rev. Endocrinol.* (2016).  
639 doi:10.1038/nrendo.2016.162
- 640 6. Sylow, L. & Richter, E. A. Current advances in our understanding of exercise as medicine in  
641 metabolic disease. *Curr. Opin. Physiol.* (2019). doi:10.1016/j.cophys.2019.04.008
- 642 7. David, J. M., Chatziioannou, A. F., Taschereau, R., Wang, H. & Stout, D. B. The hidden cost  
643 of housing practices: using noninvasive imaging to quantify the metabolic demands of  
644 chronic cold stress of laboratory mice. *Comp. Med.* **63**, 386–391 (2013).
- 645 8. Nedergaard, J. & Cannon, B. The browning of white adipose tissue: some burning issues.  
646 *Cell Metab.* **20**, 396–407 (2014).
- 647 9. Ganeshan, K. & Chawla, A. Warming the mouse to model human diseases. *Nat. Rev.*  
648 *Endocrinol.* **13**, 458–465 (2017).
- 649 10. Maloney, S. K., Fuller, A., Mitchell, D., Gordon, C. & Overton, J. M. Translating Animal  
650 Model Research: Does It Matter That Our Rodents Are Cold? *Physiology* **29**, 413–420  
651 (2014).
- 652 11. Karp, C. L. Unstressing intemperate models: how cold stress undermines mouse modeling. *J.*  
653 *Exp. Med.* **209**, 1069–1074 (2012).
- 654 12. Gaskill, B. N., Rohr, S. A., Pajor, E. A., Lucas, J. R. & Garner, J. P. Some like it hot: Mouse  
655 temperature preferences in laboratory housing. *Appl. Anim. Behav. Sci.* **116**, 279–285 (2009).
- 656 13. Martin, B., Ji, S., Maudsley, S. & Mattson, M. P. ‘Control’ laboratory rodents are  
657 metabolically morbid: Why it matters. *Proc. Natl. Acad. Sci.* **107**, 6127–6133 (2010).
- 658 14. Schmidt-Nielsen, K. Scaling: why is animal size so important. in *Cambridge University*  
659 *Press; New York, NY* (1984).
- 660 15. Williams, T. D., Chambers, J. B., Henderson, R. P., Rashotte, M. E. & Overton, J. M.  
661 Cardiovascular responses to caloric restriction and thermoneutrality in C57BL/6J mice. *Am.*  
662 *J. Physiol. Regul. Integr. Comp. Physiol.* **282**, R1459–67 (2002).
- 663 16. Yamauchi, C., Fujita, S., Obara, T. & Ueda, T. Effects of room temperature on reproduction,  
664 body and organ weights, food and water intakes, and hematology in mice. *Jikken Dobutsu.*  
665 **32**, 1–11 (1983).



- 666 17. Feldmann, H. M., Golozoubova, V., Cannon, B. & Nedergaard, J. UCP1 Ablation Induces  
667 Obesity and Abolishes Diet-Induced Thermogenesis in Mice Exempt from Thermal Stress by  
668 Living at Thermoneutrality. *Cell Metab.* **9**, 203–209 (2009).
- 669 18. Castillo, M. *et al.* Disruption of thyroid hormone activation in type 2 deiodinase knockout  
670 mice causes obesity with glucose intolerance and liver steatosis only at thermoneutrality.  
671 *Diabetes* **60**, 1082–1089 (2011).
- 672 19. Clayton, Z. S. & McCurdy, C. E. Short-term thermoneutral housing alters glucose  
673 metabolism and markers of adipose tissue browning in response to a high-fat diet in lean  
674 mice. *Am. J. Physiol. Regul. Integr. Comp. Physiol.* **315**, R627–R637 (2018).
- 675 20. Small, L., Gong, H., Yassmin, C., Cooney, G. J. & Brandon, A. E. Thermoneutral housing  
676 does not influence fat mass or glucose homeostasis in C57BL/6 mice. *J. Endocrinol.* **239**,  
677 313–324 (2018).
- 678 21. Tian, X. Y. *et al.* Thermoneutral Housing Accelerates Metabolic Inflammation to Potentiate  
679 Atherosclerosis but Not Insulin Resistance. *Cell Metab.* **23**, 165–178 (2016).
- 680 22. Rudaya, A. Y., Steiner, A. A., Robbins, J. R., Dragic, A. S. & Romanovsky, A. A.  
681 Thermoregulatory responses to lipopolysaccharide in the mouse: dependence on the dose  
682 and ambient temperature. *Am. J. Physiol. Regul. Integr. Comp. Physiol.* **289**, R1244–52  
683 (2005).
- 684 23. Giles, D. A. *et al.* Modulation of ambient temperature promotes inflammation and initiates  
685 atherosclerosis in wild type C57BL/6 mice. *Mol. Metab.* **5**, 1121–1130 (2016).
- 686 24. Kokolus, K. M. *et al.* Baseline tumor growth and immune control in laboratory mice are  
687 significantly influenced by subthermoneutral housing temperature. *Proc. Natl. Acad. Sci. U.*  
688 *S. A.* **110**, 20176–20181 (2013).
- 689 25. Eng, J. W.-L. *et al.* Housing temperature-induced stress drives therapeutic resistance in  
690 murine tumour models through beta2-adrenergic receptor activation. *Nat. Commun.* **6**, 6426  
691 (2015).
- 692 26. Keijer, J., Li, M. & Speakman, J. R. What is the best housing temperature to translate mouse  
693 experiments to humans? *Mol. Metab.* (2019). doi:10.1016/j.molmet.2019.04.001
- 694 27. Fischer, A. W., Cannon, B. & Nedergaard, J. Optimal housing temperatures for mice to  
695 mimic the thermal environment of humans: An experimental study. *Mol. Metab.* **7**, 161–170  
696 (2018).
- 697 28. Fischer, A. W., Cannon, B. & Nedergaard, J. The answer to the question “What is the best  
698 housing temperature to translate mouse experiments to humans?” is: thermoneutrality. *Mol.*  
699 *Metab.* (2019). doi:10.1016/j.molmet.2019.05.006
- 700 29. Kong, X. *et al.* Brown Adipose Tissue Controls Skeletal Muscle Function via the Secretion  
701 of Myostatin. *Cell Metab.* 1–13 (2018). doi:10.1016/j.cmet.2018.07.004
- 702 30. Sun, Y. *et al.* Voluntary wheel exercise alters the levels of miR-494 and miR-696 in the  
703 skeletal muscle of C57BL/6 mice. *Comp. Biochem. Physiol. Part - B Biochem. Mol. Biol.*  
704 **202**, 16–22 (2016).
- 705 31. Ritchie, I. R. W., Wright, D. C. & Dyck, D. J. Adiponectin is not required for exercise

- 706 training-induced improvements in glucose and insulin tolerance in mice. *Physiol. Rep.* **2**, 1–  
707 12 (2014).
- 708 32. Peppler, W. T., Anderson, Z. G., Sutton, C. D., Rector, R. S. & Wright, D. C. Voluntary  
709 wheel running attenuates lipopolysaccharide-induced liver inflammation in mice. *Am. J.*  
710 *Physiol. - Regul. Integr. Comp. Physiol.* **310**, R934–R942 (2016).
- 711 33. Hylander, B. L. & Repasky, E. A. Thermoneutrality, Mice, and Cancer: A Heated Opinion.  
712 *Trends in Cancer* **2**, 166–175 (2016).
- 713 34. Lim, S. *et al.* Cold-induced activation of brown adipose tissue and adipose angiogenesis in  
714 mice. *Nat. Protoc.* **7**, 606–15 (2012).
- 715 35. Hao, Q. *et al.* Transcriptome profiling of brown adipose tissue during cold exposure reveals  
716 extensive regulation of glucose metabolism. *Am. J. Physiol. Endocrinol. Metab.* **308**, E380-  
717 92 (2015).
- 718 36. Stanford, K. I. *et al.* A novel role for subcutaneous adipose tissue in exercise-induced  
719 improvements in glucose homeostasis. *Diabetes* **64**, 2002–14 (2015).
- 720 37. Knuth, C. M. *et al.* Prior exercise training improves cold tolerance independent of indices  
721 associated with non-shivering thermogenesis. *J. Physiol.* **596**, 4375–4391 (2018).
- 722 38. Boström, P. *et al.* A PGC1- $\alpha$ -dependent myokine that drives brown-fat-like development of  
723 white fat and thermogenesis. *Nature* **481**, 463–8 (2012).
- 724 39. Janssen, A. W. F. & Kersten, S. The role of the gut microbiota in metabolic health. *FASEB J.*  
725 **29**, 3111–23 (2015).
- 726 40. Sedorf, H. *et al.* Bacteria from diverse habitats colonize and compete in the mouse gut. *Cell*  
727 **159**, 253–66 (2014).
- 728 41. Gordon, C. J. Thermal physiology of laboratory mice: Defining thermoneutrality. *J. Therm.*  
729 *Biol.* **37**, 654–685 (2012).
- 730 42. Brychta, R. J. & Chen, K. Y. Cold-induced thermogenesis in humans. *Eur. J. Clin. Nutr.* **71**,  
731 345–352 (2017).
- 732 43. Rao, X. *et al.* Exercise protects against diet-induced insulin resistance through  
733 downregulation of protein kinase C $\beta$  in mice. *PLoS One* **8**, e81364 (2013).
- 734 44. Sato, K. *et al.* DHEA administration and exercise training improves insulin resistance in  
735 obese rats. *Nutr. Metab. (Lond)*. **9**, 47 (2012).
- 736 45. Basse, A. L. *et al.* Skeletal Muscle Insulin Sensitivity Show Circadian Rhythmicity Which Is  
737 Independent of Exercise Training Status. *Front. Physiol.* **9**, 1198 (2018).
- 738 46. Zhang, G., Yu, P. & Liu, X. Swim Training Attenuates Inflammation and Improves Insulin  
739 Sensitivity in Mice Fed with a High-Fat Diet. *Int. J. Endocrinol.* **2017**, 5940732 (2017).
- 740 47. Bradley, R. L., Jeon, J. Y., Liu, F.-F. & Maratos-Flier, E. Voluntary exercise improves  
741 insulin sensitivity and adipose tissue inflammation in diet-induced obese mice. *Am. J.*  
742 *Physiol. Endocrinol. Metab.* **295**, E586-94 (2008).
- 743 48. Marques, C. M. M., Motta, V. F., Torres, T. S., Aguila, M. B. & Mandarim-de-Lacerda, C.



- 744 A. Beneficial effects of exercise training (treadmill) on insulin resistance and nonalcoholic  
745 fatty liver disease in high-fat fed C57BL/6 mice. *Brazilian J. Med. Biol. Res. = Rev. Bras.*  
746 *Pesqui. medicas e Biol.* **43**, 467–75 (2010).
- 747 49. Kleinert, M. *et al.* Quantitative proteomic characterization of cellular pathways associated  
748 with altered insulin sensitivity in skeletal muscle following high-fat diet feeding and exercise  
749 training. *Sci. Rep.* **8**, 10723 (2018).
- 750 50. Marcinko, K. *et al.* High intensity interval training improves liver and adipose tissue insulin  
751 sensitivity. *Mol. Metab.* **4**, 903–15 (2015).
- 752 51. Ambery, A. G., Tackett, L., Penque, B. A., Brozinick, J. T. & Elmendorf, J. S. Exercise  
753 training prevents skeletal muscle plasma membrane cholesterol accumulation, cortical actin  
754 filament loss, and insulin resistance in C57BL/6J mice fed a western-style high-fat diet.  
755 *Physiol. Rep.* **5**, (2017).
- 756 52. Goldgof, M. *et al.* The chemical uncoupler 2,4-dinitrophenol (DNP) protects against diet-  
757 induced obesity and improves energy homeostasis in mice at thermoneutrality. *J. Biol. Chem.*  
758 **289**, 19341–50 (2014).
- 759 53. Mcilroy, G. D., Mitchell, S. E., Han, W., Delibegović, M. & Rochford, J. J. Female adipose  
760 tissue-specific Bcl2 knockout mice develop only moderate metabolic dysfunction when  
761 housed at thermoneutrality and fed a high-fat diet. *Sci. Rep.* **8**, 17863 (2018).
- 762 54. Egan, B. & Zierath, J. R. Exercise metabolism and the molecular regulation of skeletal  
763 muscle adaptation. *Cell Metab.* **17**, 162–184 (2013).
- 764 55. Short, K. R. *et al.* Impact of aerobic exercise training on age-related changes in insulin  
765 sensitivity and muscle oxidative capacity. *Diabetes* **52**, 1888–96 (2003).
- 766 56. Cannon, B. & Nedergaard, J. Nonshivering thermogenesis and its adequate measurement in  
767 metabolic studies. *J. Exp. Biol.* **214**, 242–53 (2011).
- 768 57. Virtue, S., Even, P. & Vidal-Puig, A. Below thermoneutrality, changes in activity do not  
769 drive changes in total daily energy expenditure between groups of mice. *Cell Metab.* **16**,  
770 665–71 (2012).
- 771 58. Clarke, S. F. *et al.* Exercise and associated dietary extremes impact on gut microbial  
772 diversity. *Gut* **63**, 1913–20 (2014).
- 773 59. Lambert, J. E. *et al.* Exercise training modifies gut microbiota in normal and diabetic mice.  
774 *Appl. Physiol. Nutr. Metab.* **40**, 749–52 (2015).
- 775 60. Janssen, A. W. F. & Kersten, S. The role of the gut microbiota in metabolic health. *FASEB J.*  
776 **29**, 3111–23 (2015).
- 777 61. Ley, R. E., Turnbaugh, P. J., Klein, S. & Gordon, J. I. Microbial ecology: human gut  
778 microbes associated with obesity. *Nature* **444**, 1022–3 (2006).
- 779 62. Org, E. *et al.* Relationships between gut microbiota , plasma metabolites , and metabolic  
780 syndrome traits in the METSIM cohort. 1–14 (2017). doi:10.1186/s13059-017-1194-2
- 781 63. Nay, K. *et al.* Gut bacteria are critical for optimal muscle function:a potential link with  
782 glucose homeostasis. *Am. J. Physiol. Endocrinol. Metab.* (2019).

783 doi:10.1152/ajpendo.00521.2018

- 784 64. Swoap, S. J. *et al.* Vagal tone dominates autonomic control of mouse heart rate at  
785 thermoneutrality. *AJP Hear. Circ. Physiol.* **294**, H1581–H1588 (2008).
- 786 65. Swoap, S. J., Overton, J. M. & Garber, G. Effect of ambient temperature on cardiovascular  
787 parameters in rats and mice: a comparative approach. *Am. J. Physiol. Regul. Integr. Comp.*  
788 *Physiol.* **287**, R391-6 (2004).
- 789 66. Hussey, S. E. *et al.* Effect of exercise on the skeletal muscle proteome in patients with type 2  
790 diabetes. *Med. Sci. Sports Exerc.* **45**, 1069–76 (2013).
- 791 67. Hoffman, N. J. *et al.* Global Phosphoproteomic Analysis of Human Skeletal Muscle Reveals  
792 a Network of Exercise-Regulated Kinases and AMPK Substrates. 922–935 (2015).  
793 doi:10.1016/j.cmet.2015.09.001
- 794 68. Stolle, S. *et al.* Running-wheel activity delays mitochondrial respiratory flux decline in aging  
795 mouse muscle via a post-transcriptional mechanism. *Aging Cell* **17**, (2018).
- 796 69. Bratt-welinder, C. & Ekblad, L. Coomassie staining as loading control in western blot  
797 analysis. *J. Proteome Res.* 1416–1419 (2010). doi:10.1021/pr1011476
- 798 70. Krych, Ł. *et al.* Have you tried spermine? A rapid and cost-effective method to eliminate  
799 dextran sodium sulfate inhibition of PCR and RT-PCR. *J. Microbiol. Methods* **144**, 1–7  
800 (2018).
- 801 71. Edgar, R. C. Updating the 97% identity threshold for 16S ribosomal RNA OTUs.  
802 *Bioinformatics* **34**, 2371–2375 (2018).
- 803 72. Kim, O.-S. *et al.* Introducing EzTaxon-e: a prokaryotic 16S rRNA gene sequence database  
804 with phylotypes that represent uncultured species. *Int. J. Syst. Evol. Microbiol.* **62**, 716–721  
805 (2012).

806

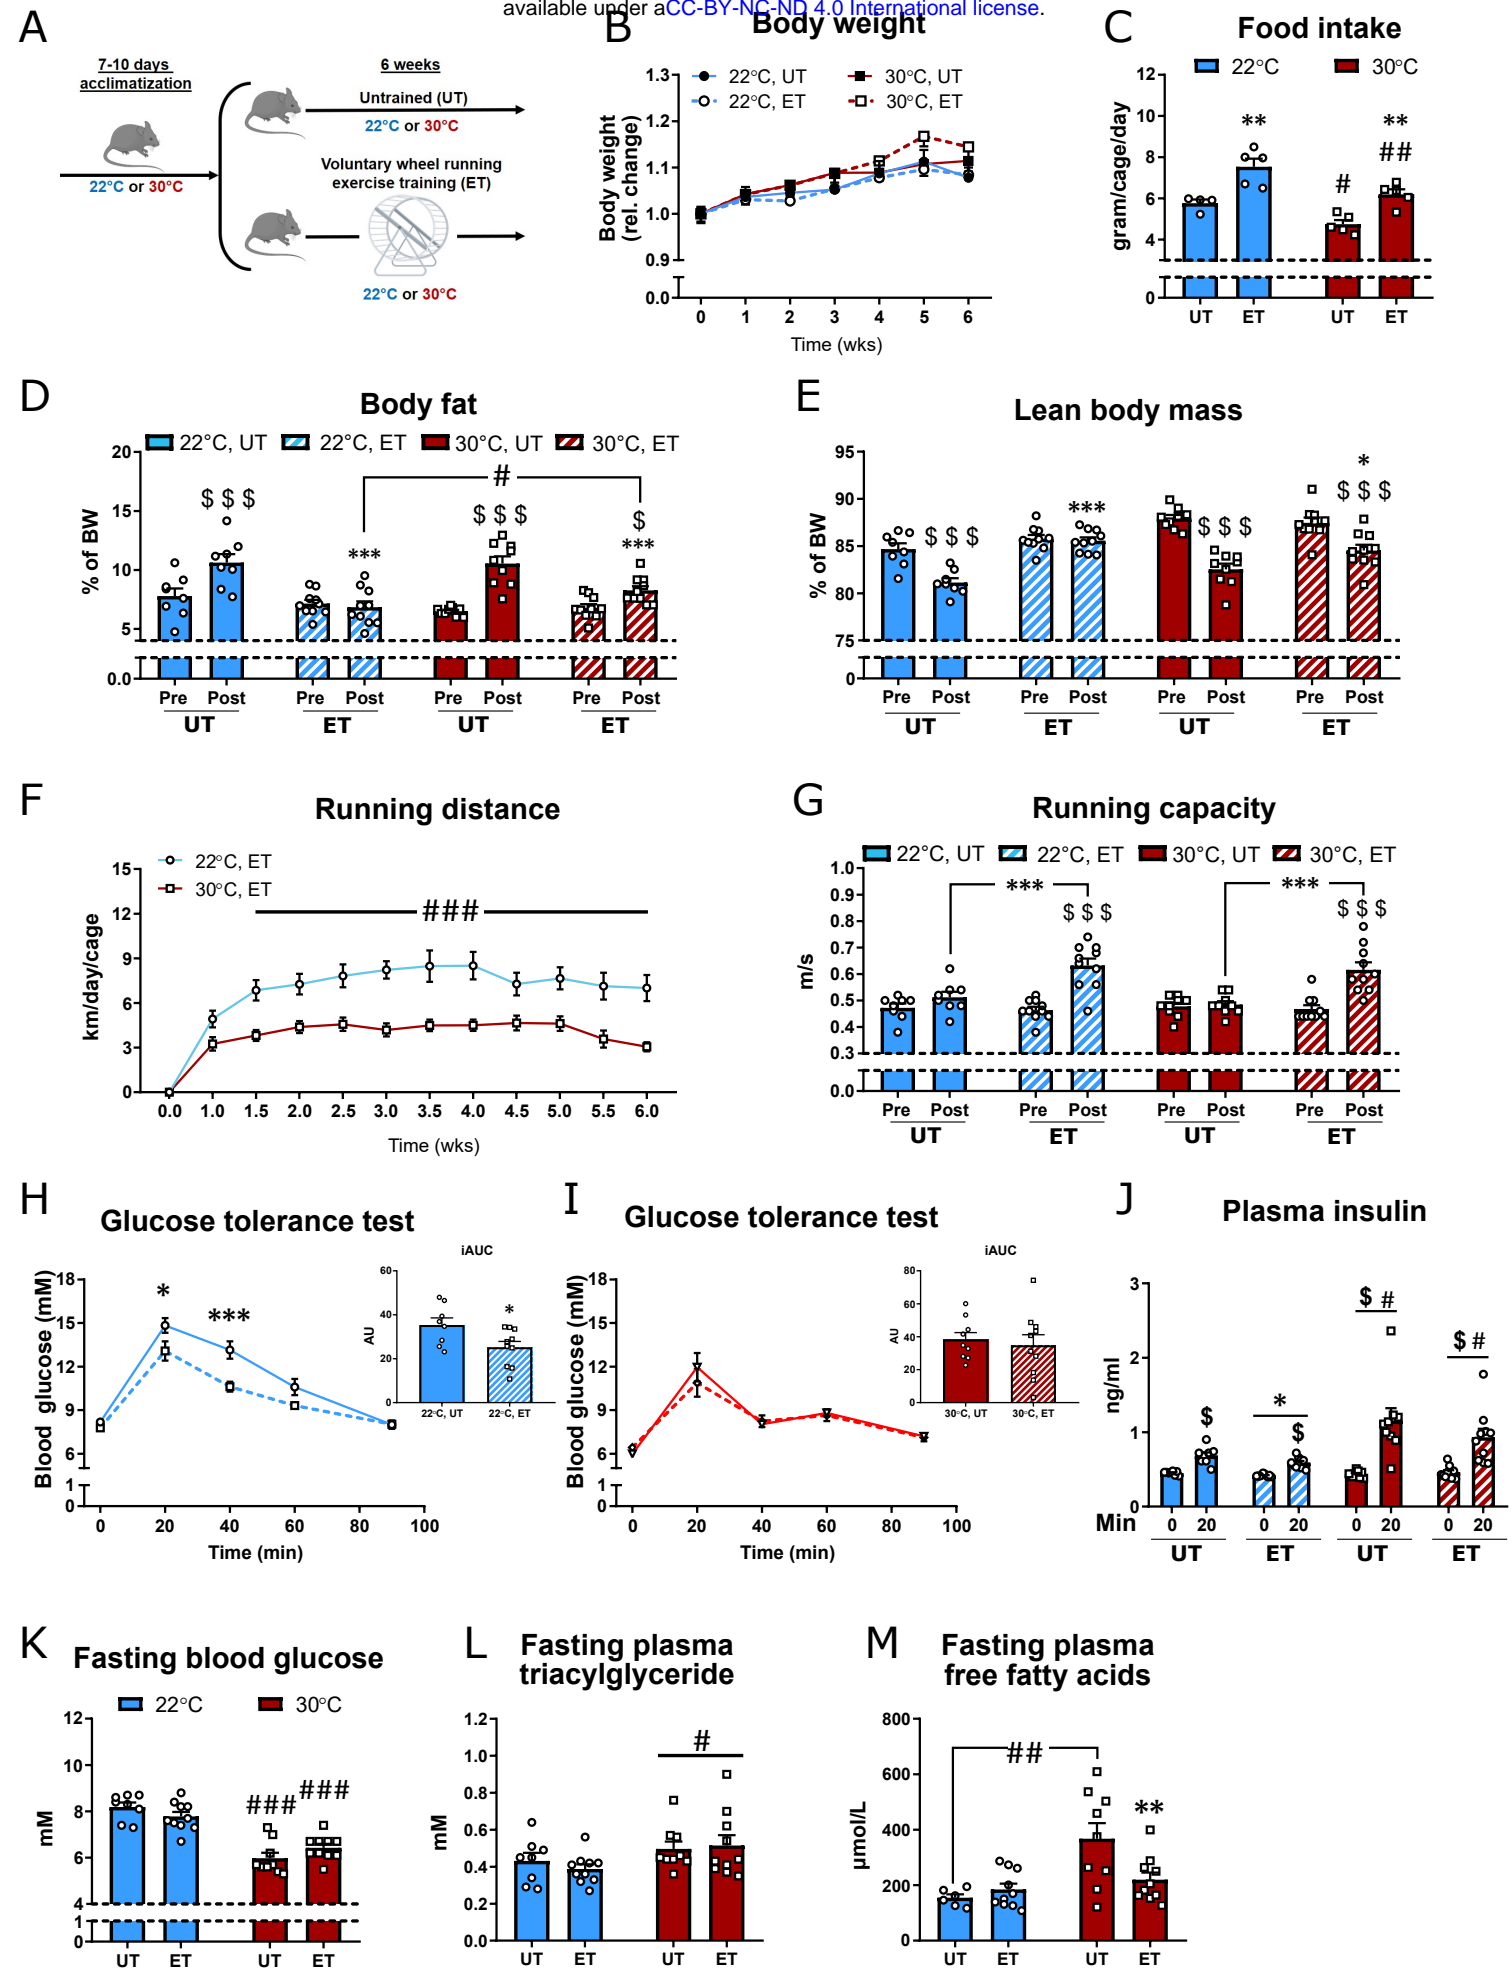

**Figure 2**

bioRxiv preprint doi: <https://doi.org/10.1101/651588>; this version posted May 27, 2019. The copyright holder for this preprint (which was not certified by peer review) is the author/funder, who has granted bioRxiv a license to display the preprint in perpetuity. It is made available under aCC-BY-NC-ND 4.0 International license.

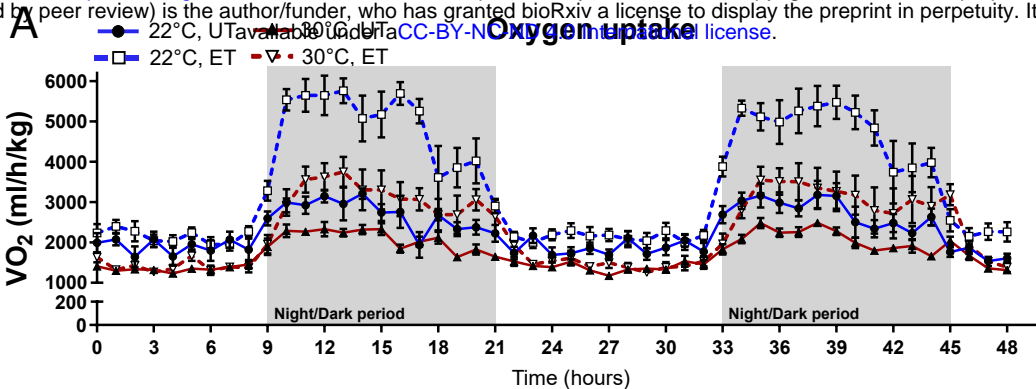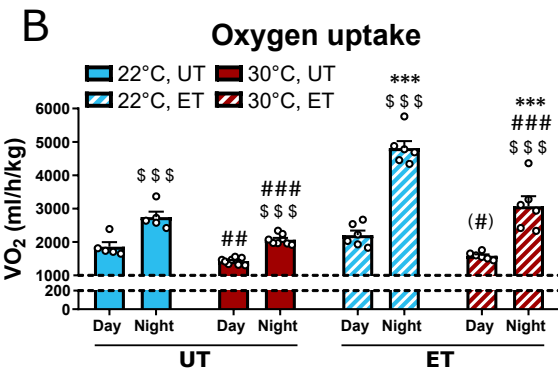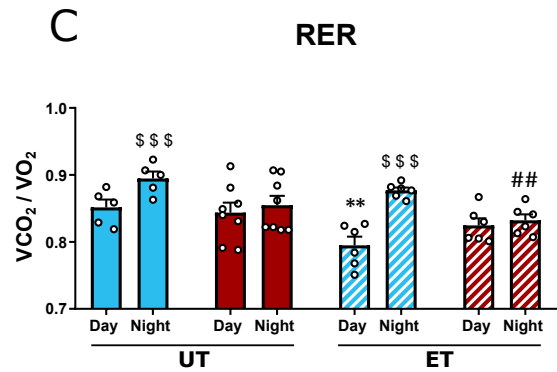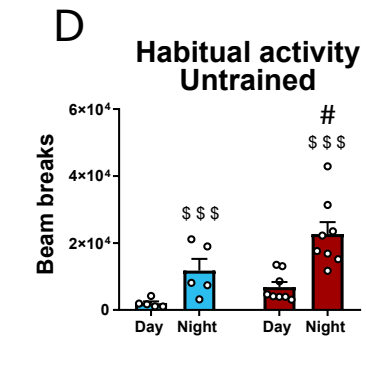

**Wheel running analysis**

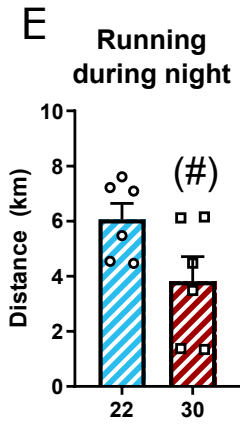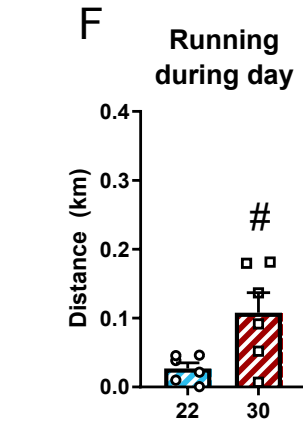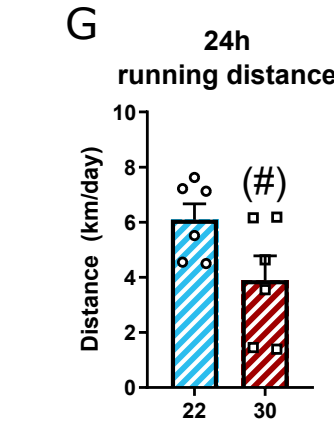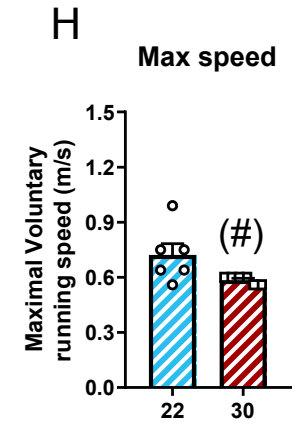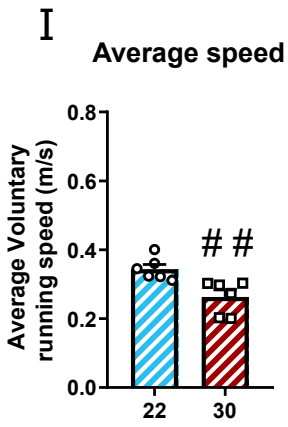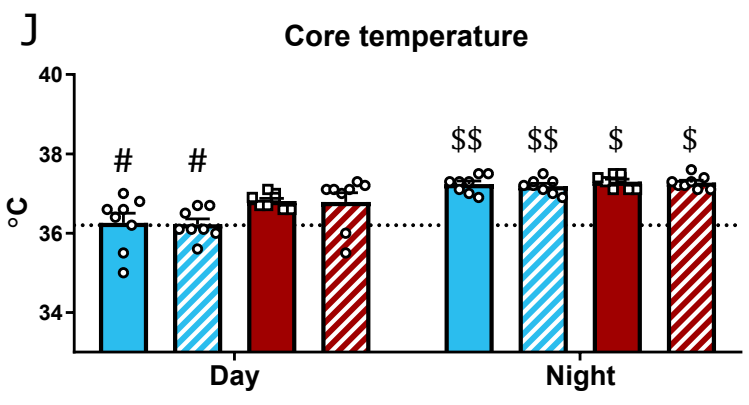

## Figure 3

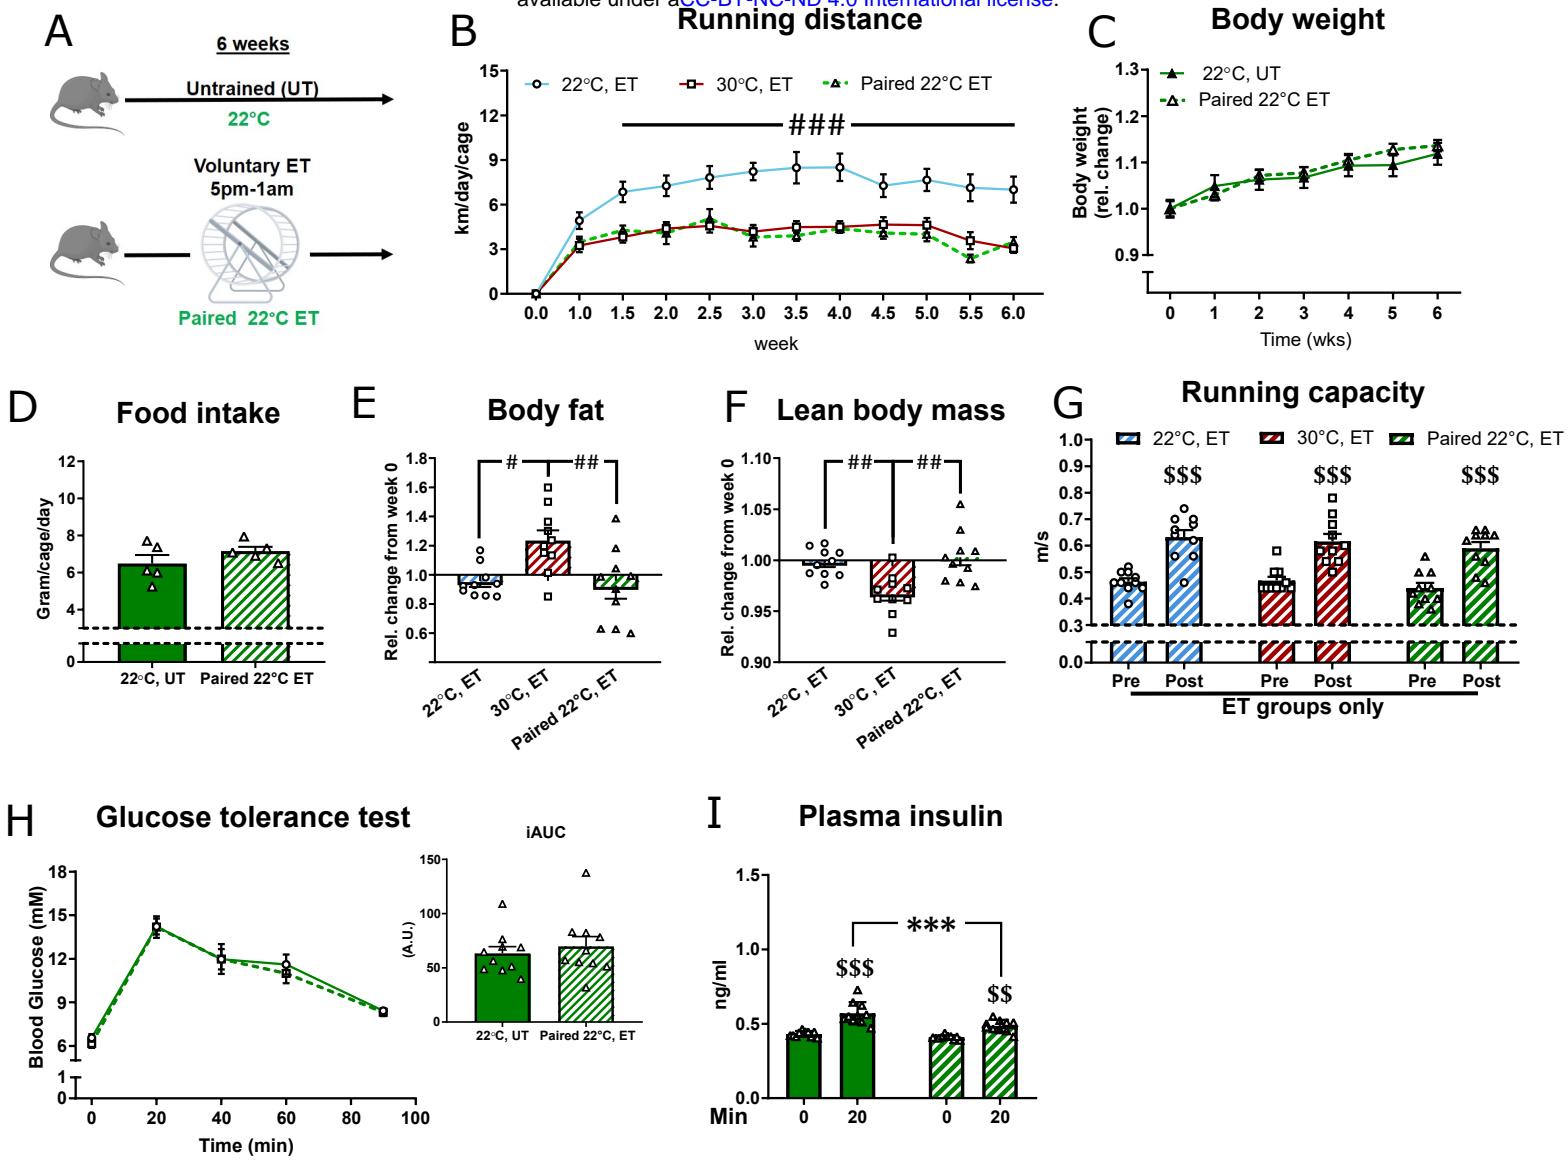

## Figure 4

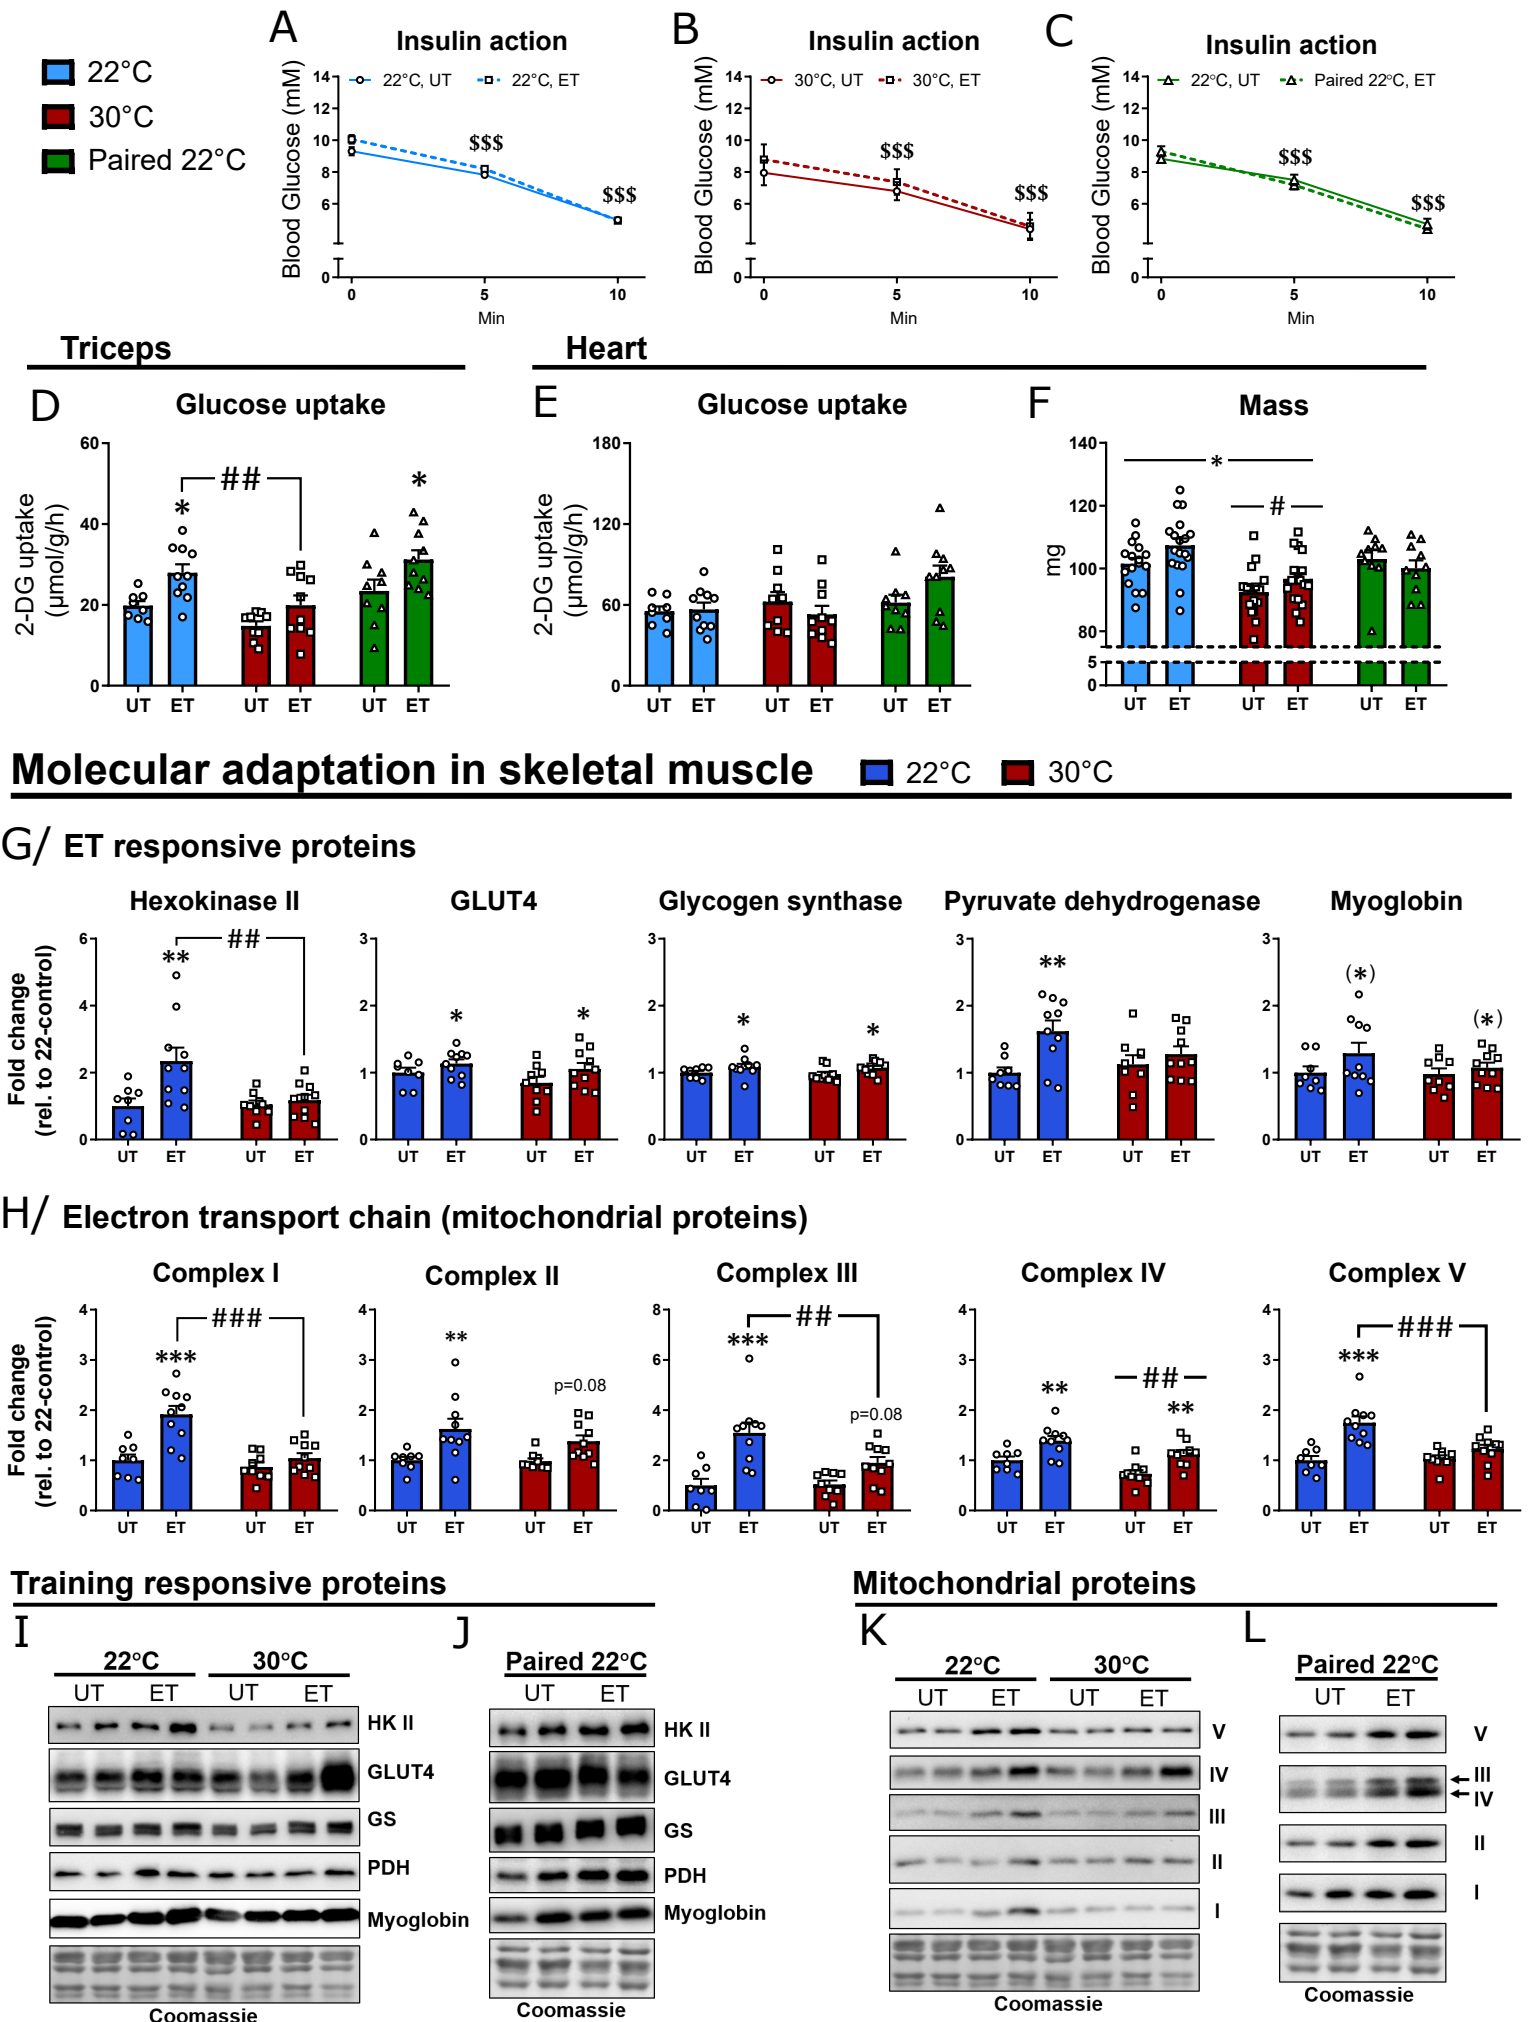





## Figure 6

### A/ Clustering of the GM at different temperatures

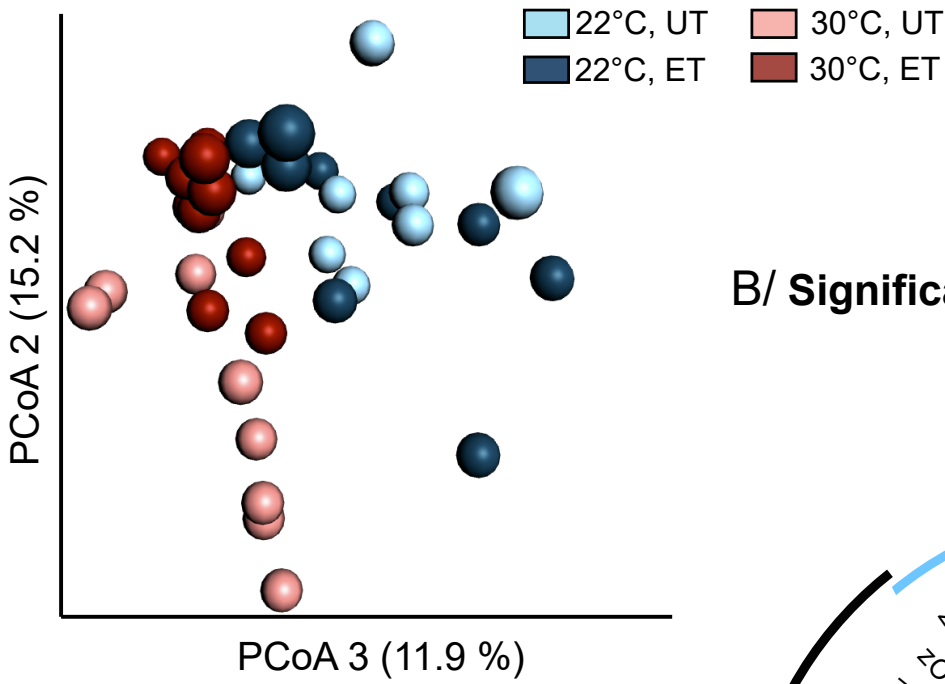

### B/ Significantly regulated phylotypes

FDR t-test p-val  $\leq 0.05$

- UT, 22°C vs. 30°C (black)
- 22°C, UT vs. ET (light blue)
- 30°C, UT vs. ET (red)

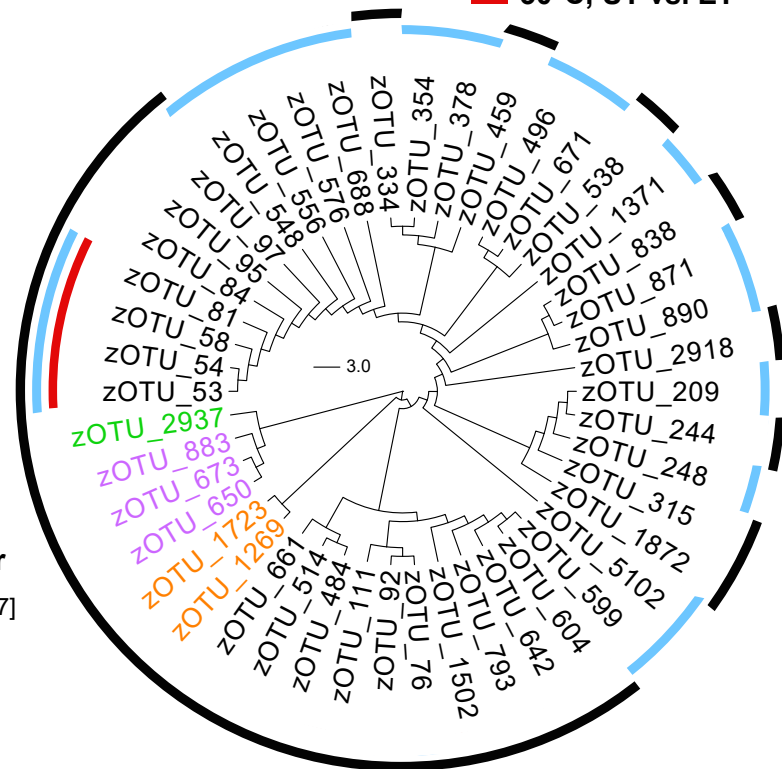

### C/ Relative abundance of phylotype families at different temperatures

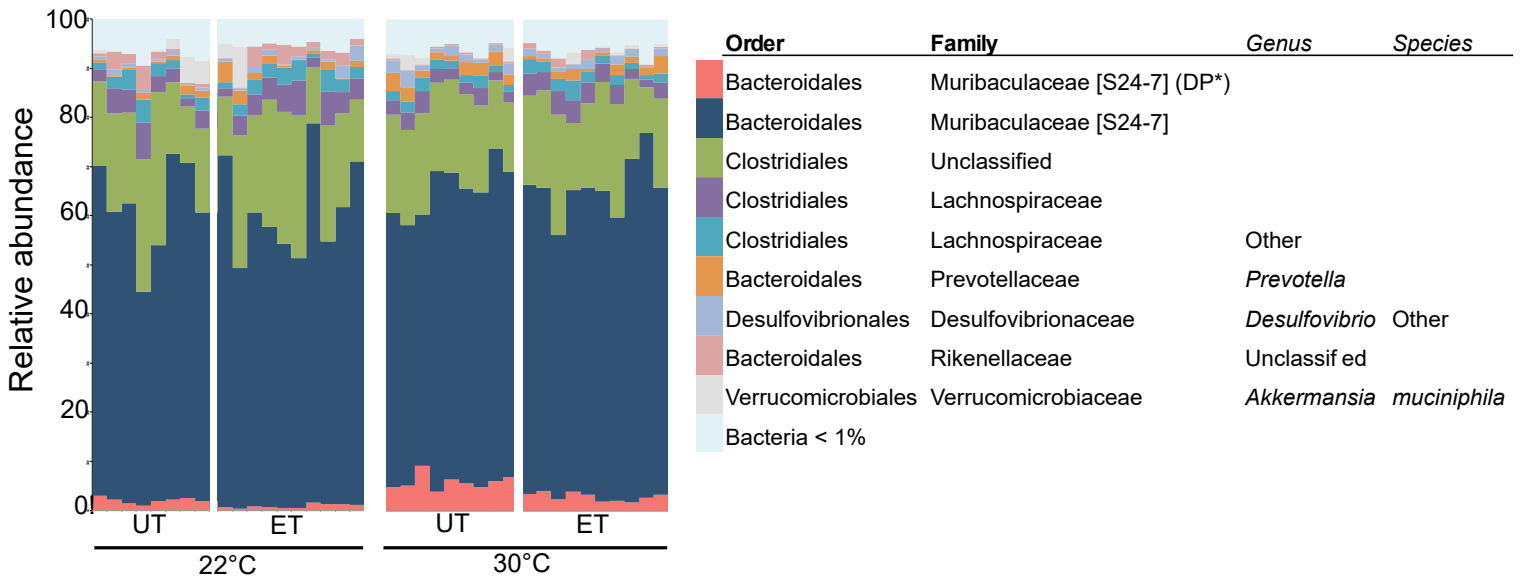



# Appendix Figure 1

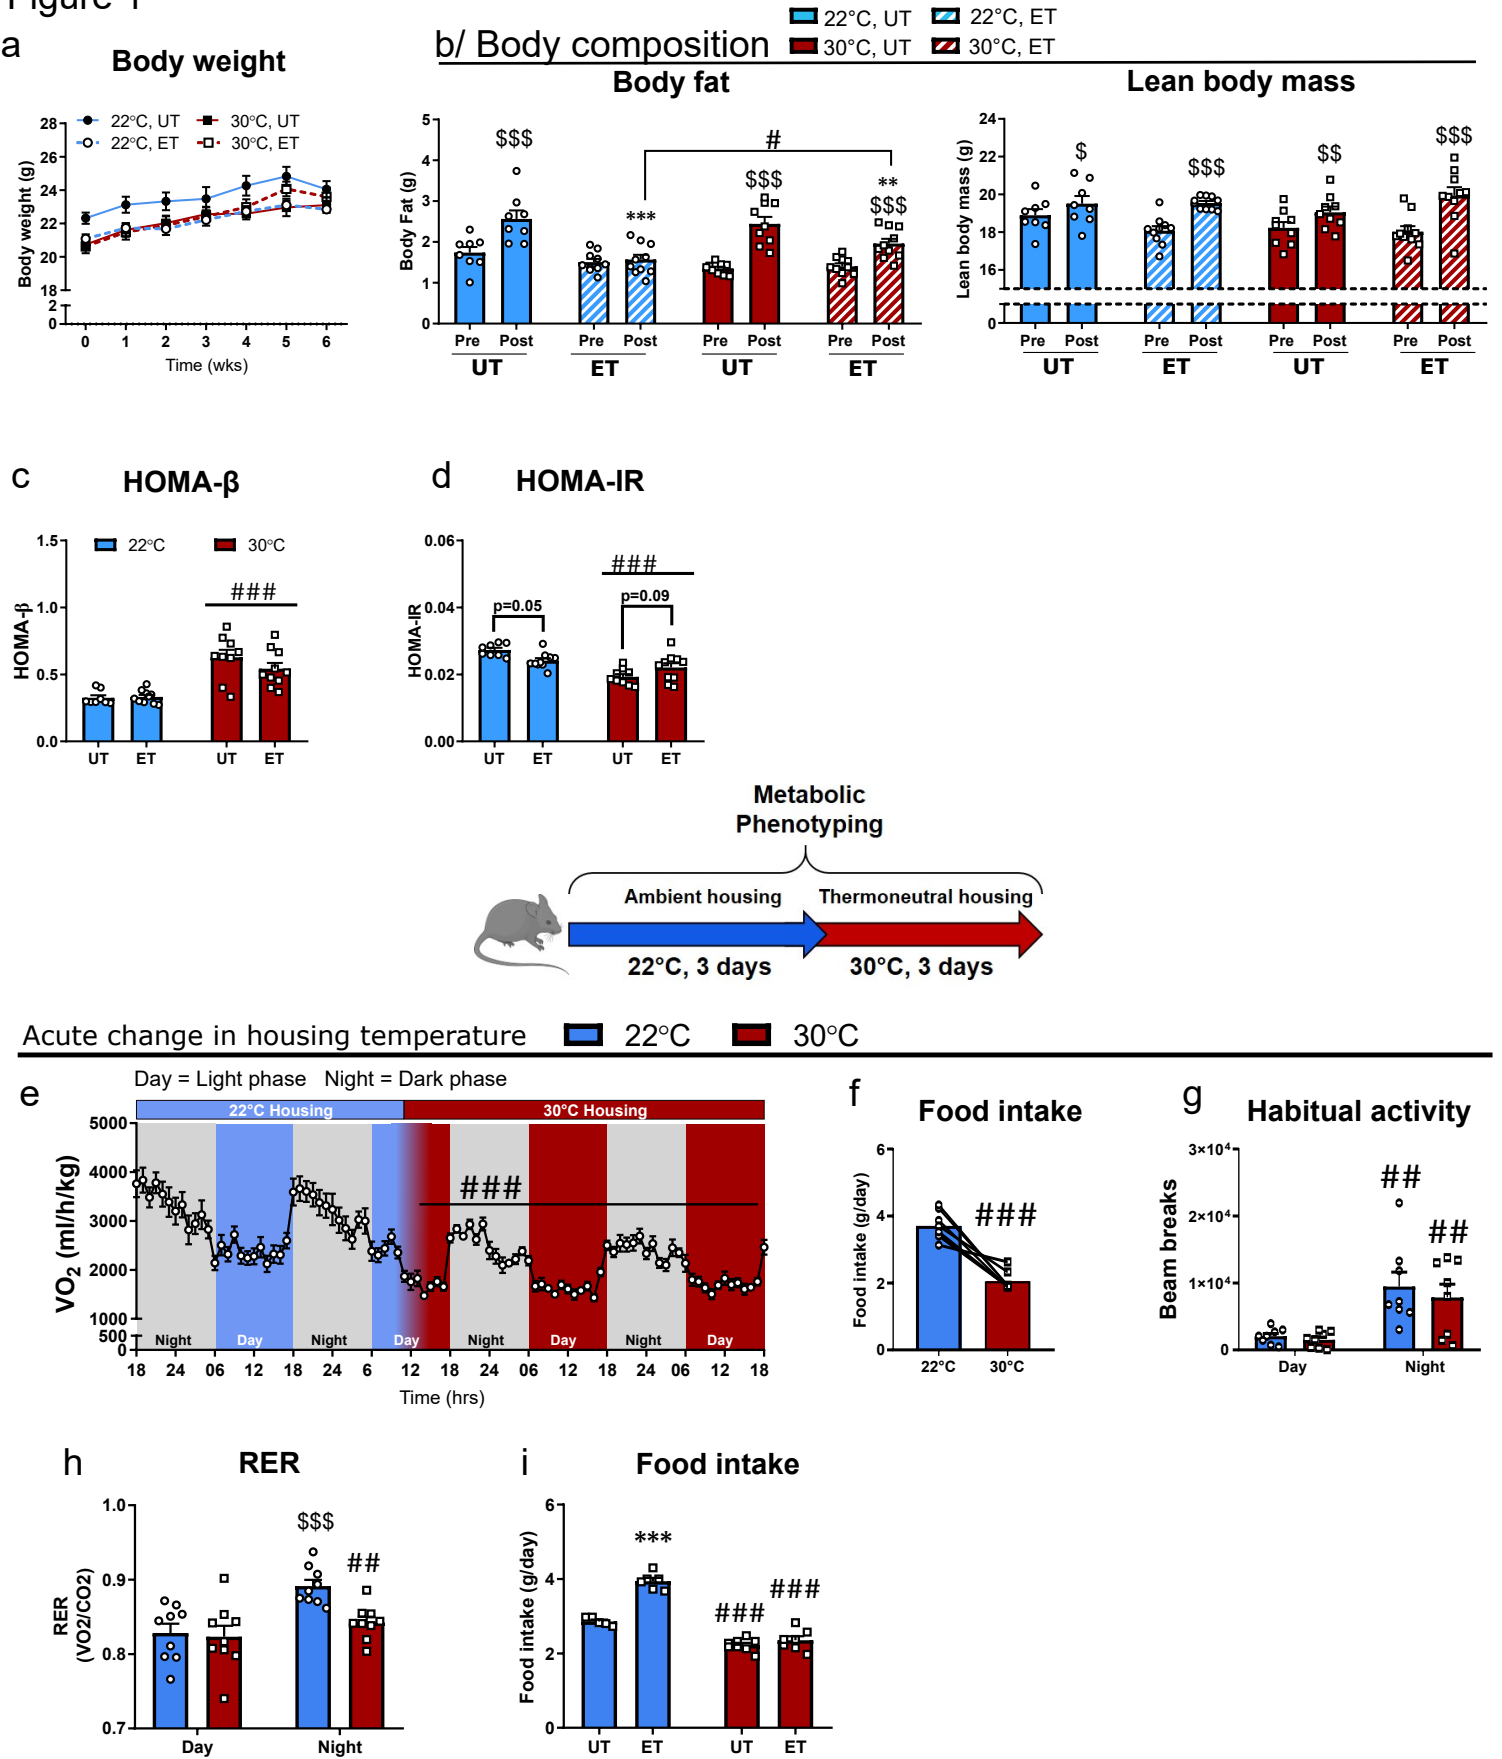

# Appendix Figure 2

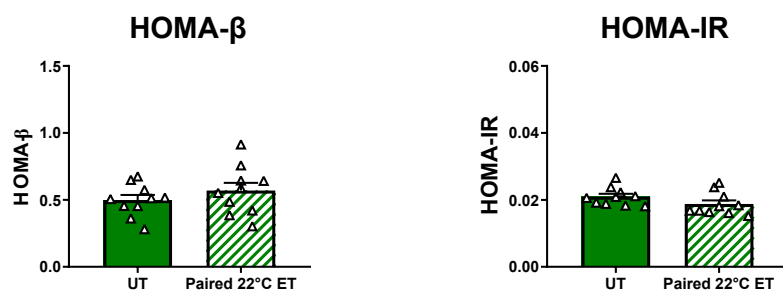

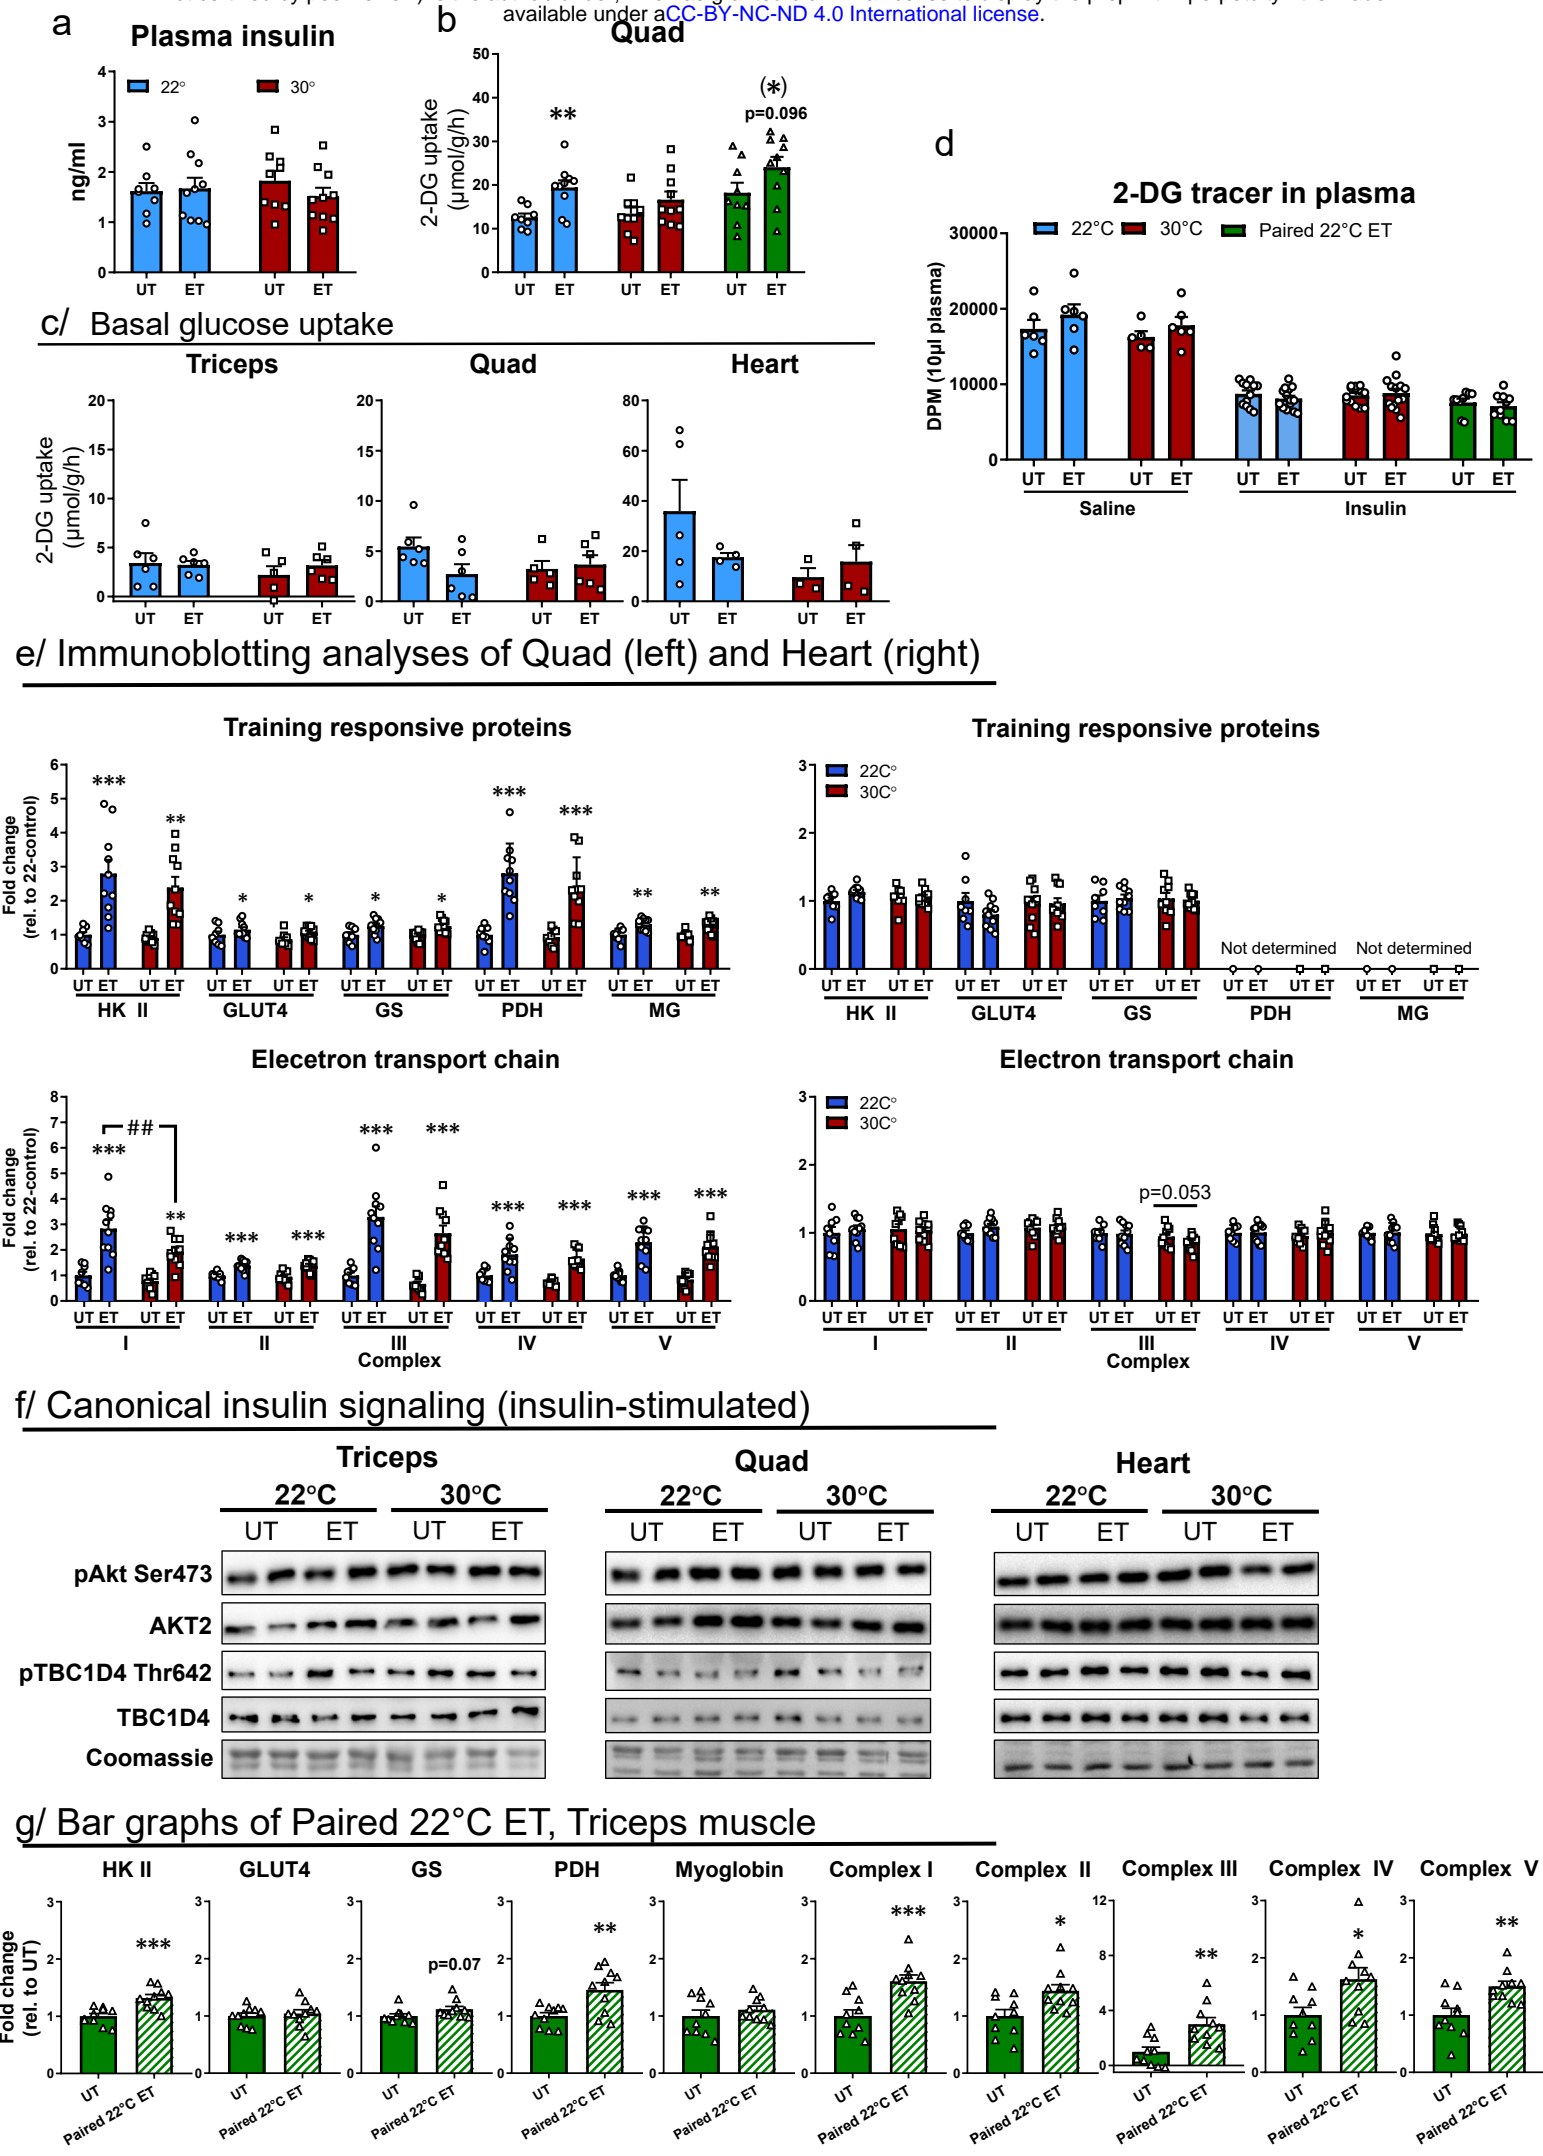

## Appendix Figure 4

### a/ Basal glucose uptake

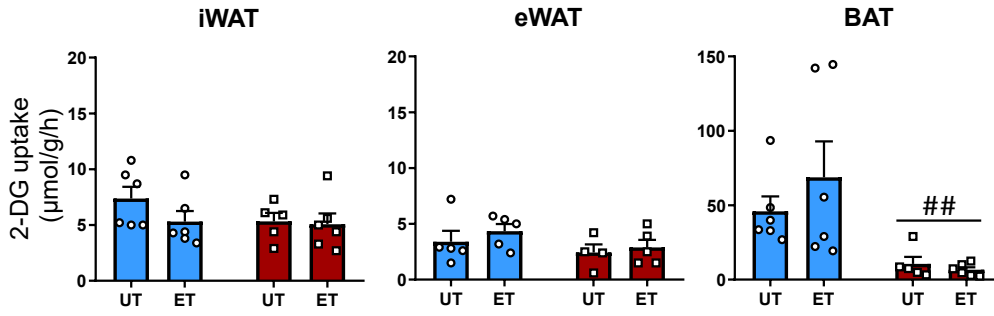

### b/ Paired 22°C, Immunoblotting of iWAT

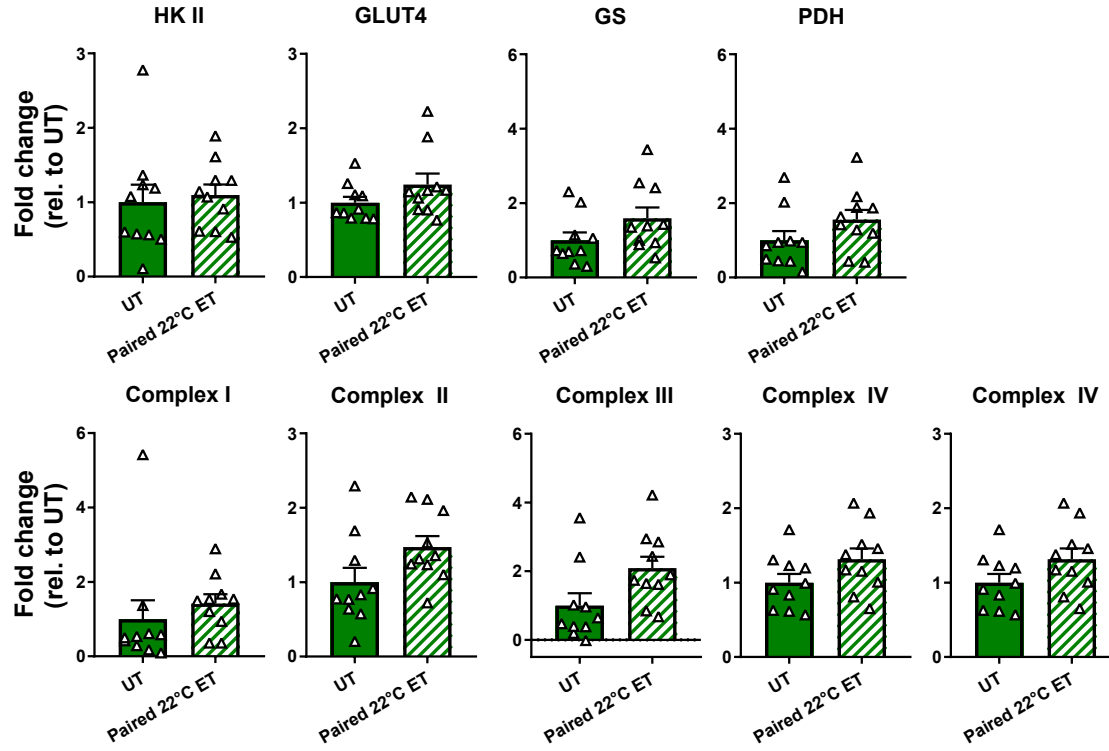

### c/ Genes involved in thermogenesis (qPCR)

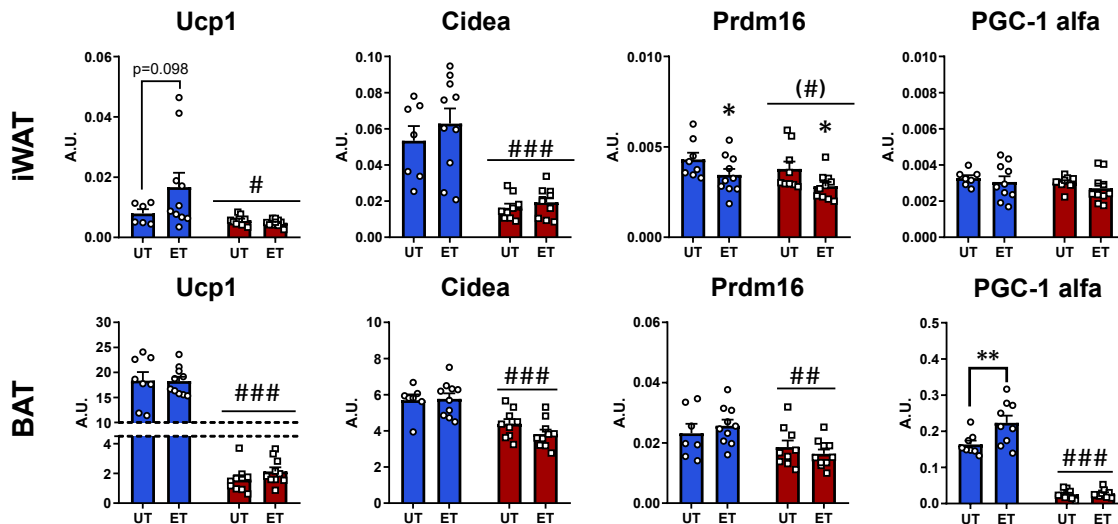

## Appendix Figure 5

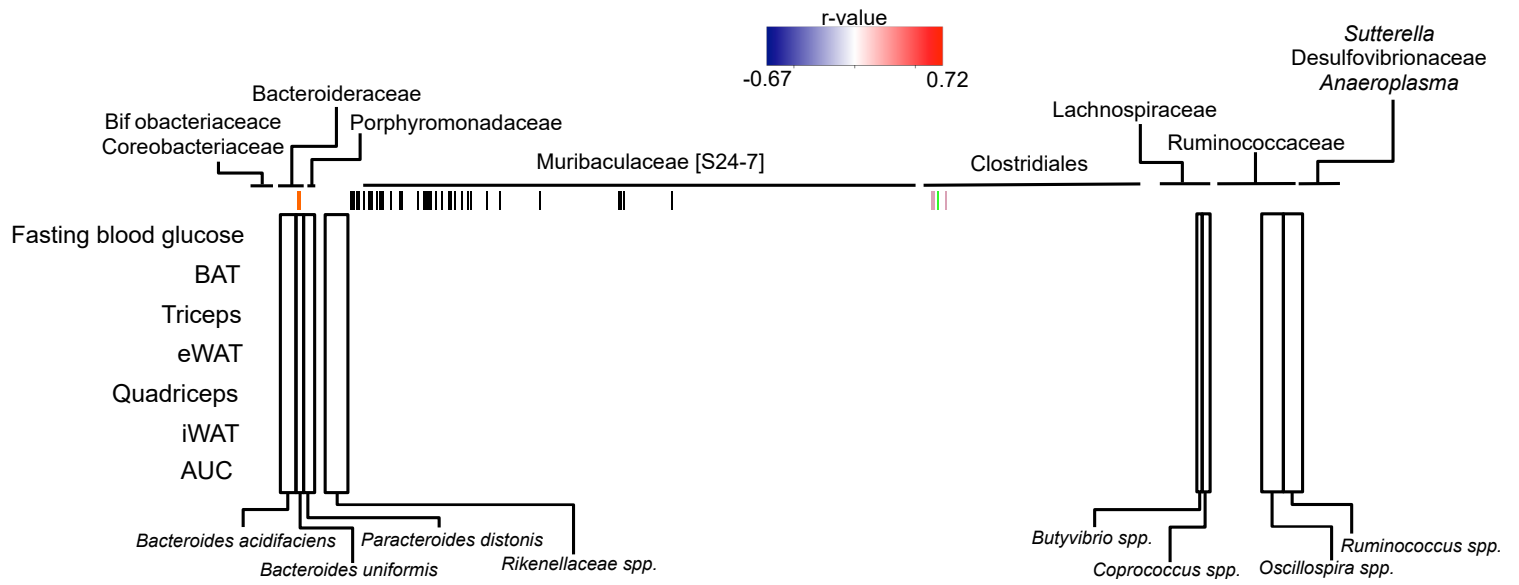

Source: https://www.biorxiv.org/content/10.1101/651588v1.full.pdf
